1    CONCATENATION IN THE ANOMALY ZONE

2

3    **Why concatenation fails in the anomaly zone**

4    FÁBIO K. MENDES<sup>1,\*</sup> AND MATTHEW W. HAHN<sup>1,2</sup>

5

6    <sup>1</sup>*Department of Biology, Indiana University, Bloomington, IN, 47405, USA*

7    <sup>2</sup>*School of Informatics and Computing, Indiana University, Bloomington, IN, 47405, USA*

8

9    \*Correspondence to be sent to: 1001 E. Third St., Bloomington, IN, 47405, USA.

10   [fkmenes@indiana.edu](mailto:fkmenes@indiana.edu)

11

12

13

14

15

16

17

18

19

20

21

22

23

24 ABSTRACT

25

26 Genome-scale sequencing has been of great benefit in recovering species trees, but has not  
27 provided final answers. Despite the rapid accumulation of molecular sequences, resolving short  
28 and deep branches of the tree of life has remained a challenge, and has prompted the development  
29 of new strategies that can make the best use of available data. One such strategy – the  
30 concatenation of gene alignments – can be successful when coupled with many tree estimation  
31 methods, but has also been shown to fail when there are high levels of incomplete lineage sorting.  
32 Here, we focus on the failure of likelihood-based methods in retrieving a rooted, asymmetric  
33 four-taxon species tree from concatenated data when the species tree is in or near the anomaly  
34 zone – a region of parameter space where the most common gene tree does not match the species  
35 tree because of incomplete lineage sorting. First, we use coalescent theory to prove that most  
36 informative sites will support the species tree in the anomaly zone, and that as a consequence  
37 maximum-parsimony succeeds in recovering the species tree from concatenated data. We further  
38 show that maximum-likelihood tree estimation from concatenated data fails both inside and  
39 outside the anomaly zone, and that this failure is unconnected to the frequency of the most  
40 common gene tree. We provide support for a hypothesis that likelihood-based methods fail in and  
41 near the anomaly zone because discordant sites on the species tree have a lower likelihood than  
42 those that are discordant on alternative topologies. Our results confirm and extend previous  
43 reports of the failure and success of likelihood- and parsimony-based methods, and highlight  
44 avenues for future work improving the performance of methods aimed at recovering species tree.  
45  
46 Keywords: coalescent, parsimony, species tree, incomplete lineage sorting, anomalous gene tree

47           One of the major goals of evolutionary biology is the reconstruction of species relationships  
48 (Edwards 2009). Species trees – or phylogenies – are valued end products themselves (Hinchliff  
49 et al. 2015), but it is perhaps their central role in comparative studies that makes their accurate  
50 reconstruction so critical. Comparative analyses can include inferences about trait evolution, the  
51 dynamics of extinction and speciation, and species divergence times (O’Meara 2012; Hahn and  
52 Nakhleh 2016).

53           Unfortunately, the quest of reconstructing phylogenies has always been a difficult one. A  
54 scarcity of data was a major hurdle in phylogenetic analyses for 30 years after the birth of  
55 molecular systematics (Zuckermandl and Pauling 1965) due to the technical and financial  
56 challenges of DNA and protein sequencing. Small datasets meant that sampling error was likely  
57 to occur, and the resulting disagreement between inferred trees had to be reconciled (Slowinski  
58 and Page 1999). As a consequence, a major topic of contention was whether and how to combine  
59 datasets (Huelsenbeck et al. 1996; Page 1996).

60           With the accumulation of larger datasets, a practice that became known as “concatenation”  
61 was widely adopted (Philippe et al. 2005; Edwards 2009). Concatenation is an intuitive procedure  
62 aimed at combining the information contained in the sequences of many genes in a single  
63 analysis. Concatenated datasets were easily analyzed by existing tree-building methods, including  
64 those employing explicit models of sequence evolution (which had come to dominate  
65 phylogenetics by then; Steel and Penny 2000). Initial studies using concatenation yielded high-  
66 confidence phylogenies from genes whose individual trees were often discordant (e.g., Soltis et  
67 al. 1999; Murphy et al. 2001; Rokas et al. 2003). Concatenation was therefore seen as holding the  
68 promise to end the problem of sampling error and the incongruence it produced (Gee 2003).

69           The amassing of more genes – followed by concatenation – is indeed expected to reduce  
70 the amount of noise due to sampling error. Many phenomena, however, pose difficulties to this

71 approach because they produce discordant trees for biological reasons. Among these phenomena,  
72 incomplete lineage sorting (ILS) is perhaps the most well studied, partly because it is conducive  
73 to modeling and mathematical characterization (Hudson 1983; Tajima 1983; Pamilo and Nei  
74 1988). Going backwards in time, ILS is said to occur when lineages from the same population  
75 fail to coalesce, and instead coalesce in an ancestral population. As a result, they may coalesce  
76 with more distantly related lineages, leading to discordance. ILS is relevant to all phylogenetic  
77 analyses because it results from an inherent property of natural populations, and has accordingly  
78 been shown to be pervasive across the tree of life (e.g., Pollard et al. 2006; White et al. 2009;  
79 Hobolth et al. 2011; Brawand et al. 2014; Zhang et al. 2014; Suh et al. 2015; Pease et al. 2016).  
80 Combining loci that are discordant due to ILS means that concatenation analyses will be  
81 averaging over many different topologies; the hope is that the most common pattern will coincide  
82 with the true species relationships.

83         However, sometimes the most common gene tree topology does not coincide with the  
84 species tree: in extreme cases ILS can produce unexpected results in an area of tree space called  
85 the “anomaly zone” (AZ; Degnan and Rosenberg 2006). ILS is increasingly more likely as  
86 species tree internal branches get shorter (i.e., as the time between two or more speciation events  
87 is shorter). When two or more consecutive internal branches on a species tree are sufficiently  
88 short, gene trees incongruent with the species tree can be more common than congruent gene  
89 trees (Fig. 1; Degnan and Salter 2005; Degnan and Rosenberg 2006). In other words, inside the  
90 AZ the topology of the most common gene tree (also referred to as the “anomalous gene tree”  
91 [AGT]; Fig. 1) in the dataset does not match that of the species tree. The AZ was found to be  
92 particularly troublesome for species tree estimation, as it was shown via simulation that for  
93 species trees inside the AZ, concatenation can lead to a maximum-likelihood tree whose topology  
94 matches the AGT rather than the species tree (Kubatko and Degnan 2007). The finding that the

95 AZ could pose problems for species tree estimation motivated a decade's worth of research into  
96 methods that could recover the correct species relationships (e.g., Liu and Pearl 2007; Liu et al.  
97 2009, 2010; Heled and Drummond 2010; Larget et al. 2010; Mirarab and Warnow 2015). Along  
98 with these new methods came studies into the behavior of traditional tree inference methods on  
99 concatenated data in the AZ (e.g., Liu and Edwards 2009) and the conditions under which the AZ  
100 could impact empirical studies (e.g., Huang and Knowles 2009).

101 Here, we explore two interesting results from this literature, and their implications for  
102 phylogenetic reconstruction: (i) Both parsimony- and distance-based methods appear to succeed  
103 in inferring the species tree *inside* the AZ (Liu and Edwards 2009), and (ii) Maximum-likelihood  
104 species tree estimates from concatenated data can be incorrect just *outside* the AZ (Kubatko and  
105 Degnan 2007). These two observations are not consistent with the accepted narrative concerning  
106 problems with concatenation inside the AZ, but both appear to be correct (see below). To explore  
107 these results – and the behavior of concatenation more generally – we use coalescent theory to  
108 mathematically demonstrate why parsimony succeeds inside the AZ for a rooted species tree with  
109 four taxa. We then provide an explanation as to why maximum-likelihood applied to  
110 concatenation can fail both inside and outside the AZ. In fact, we show that the failure of such  
111 approaches is not directly tied to the AZ at all. Our results cast doubt on the seemingly common  
112 notion that concatenation is the sole culprit to blame for incorrect species tree estimates from  
113 datasets in the AZ. Finally, we suggest future research directions in light of our results.

114

115 MOST INFORMATIVE SITES IN THE ANOMALY ZONE SUPPORT THE SPECIES TREE

116

117 Theoretical results concerning the anomaly zone have focused on the distribution and  
118 frequencies of different gene trees (Degnan and Rosenberg 2006, 2009; Rosenberg and Tao

119 2008). If species trees are constructed by simply taking the most common gene tree (also known  
120 as “democratic vote”), then in the AZ the species tree will incorrectly be inferred to be the AGT.  
121 However, this method is rarely used, and is not directly relevant to concatenated analyses unless  
122 the most common site pattern also supports the most common gene tree. Informative site patterns  
123 in molecular phylogenetics are the result of substitutions occurring along the internal branches of  
124 a gene tree (here we use the term “gene” to mean any non-recombining genomic segment).  
125 Despite the greater frequency of anomalous gene trees in the AZ (compared to congruent gene  
126 trees), because of their very short internal branches we hypothesized that the most common site  
127 patterns would still support the species tree. If this is the case, parsimony methods would support  
128 the species tree inside the AZ.

129       In order for site patterns supporting the species tree to be the most common, the total length  
130 of concordant internal branches (i.e., the sum of lengths, over all gene trees, of internal branches  
131 that exist in the species tree) must be greater than that of internal branches supporting any of the  
132 other unique topologies. Under an infinite-sites mutation model the topology supported by the  
133 greatest total internal branch length will also be supported by the largest number of informative  
134 site patterns. Therefore, to determine the expected number of informative site patterns supporting  
135 any topology when a large number of gene trees are sampled, one must know (i) the probability  
136 of all gene tree topologies, and (ii) the expected lengths of the internal branches present in each  
137 of these topologies. Knowing (i) and (ii) allows the calculation of  $S_t$ , the total length of internal  
138 branches supporting any topology  $t$  in  $T$ , the set of all possible gene tree topologies under the  
139 species tree. In the case of a rooted four-taxon species tree, for example, there are 15 possible  
140 topologies, and so  $|T| = 15$  with  $t$  taking any value from 1 to 15 (Table 1).  $S_t$  can then be  
141 computed for any of these 15 topologies.

142 Computing  $S_t$  is done by first identifying the set of all topologies,  $U$ , sharing internal  
143 branches with  $t$ , and recording the probability of each topology,  $u$ , in  $U$ . We denote these  
144 probabilities  $P(u)$ . Second, for each topology  $u$ , we must identify the set of all internal branches,  
145  $B_{u,t}$ , that it shares with  $t$ . Each branch  $b$  in  $B_{u,t}$  is labeled with a number from 1 to  $|B_{u,t}|$ , and we  
146 record the expected length of each branch  $b$  given  $u$ ,  $L(b|u)$ . Therefore,  $S_t$  can be calculated as:

147

$$S_t = \sum_{u; u \in U} \sum_{b; b \in B_{u,t}} P(u) L(b | u) . \quad (1)$$

148

149

150 Whichever topology  $t$  maximizes  $S_t$  will by definition be supported by the largest number of  
151 informative site patterns, and will usually also be the most parsimonious tree.

152 When ILS is the only cause of phylogenetic incongruence, both the probability of  
153 observing each different gene tree topology and the expected lengths of their internal branches  
154 will be functions of the species tree's internal branch lengths. In the case of the four-taxon  
155 species tree (((A,B),C),D),E) (where E is the outgroup, henceforth omitted from parenthetic  
156 notation), the probability of each of the 15 possible topologies has been derived (Table 1;  
157 Rosenberg 2002). Under this species tree, the most common gene tree will always be either  
158 (((A,B),C),D) (outside the AZ; Fig. 1b) or ((A,B),(C,D)) (inside the AZ; Fig. 1b). In evaluating  
159 the strength of support for the species tree versus the AGT, we can simplify our calculations by  
160 noting that these two competing topologies differ in only the single, deepest internal branch: this  
161 branch subtends ((A,B),C) in the congruent gene tree, while in the AGT it subtends (C,D) (the  
162 internal branch leading to (A,B) is shared by both topologies; Fig. 1a). Therefore, understanding  
163 which topology is supported by the most informative site patterns inside the AZ only requires us  
164 to compare the total length of branches subtending ((A,B),C) to that of branches subtending  
165 (C,D).

166 A closer look at the 15 distinct gene tree topologies reveals that only six are relevant to  
 167 these two internal branches (Fig. 2). The topologies (((A,B),C),D), (((A,C),B),D) and  
 168 (((B,C),A),D) ( $u = 4, 6$  and  $10$ , respectively; Table 1) share one internal branch each with the  
 169 species tree topology (i.e.,  $|B_{4,4}| = |B_{6,4}| = |B_{10,4}| = 1$ ; Fig. 2), while the topologies ((A,B),(C,D)),  
 170 (((C,D),A),B), and (((C,D),B),A) ( $u = 1, 14$  and  $15$ , respectively; Table 1) share one internal  
 171 branch each with the AGT (Fig. 2). Coalescent theory can be used to find the expected frequency  
 172 of these topologies and the length of the relevant branches within them.

173 For species tree (((A,B),C),D), application of equation 1 shows that the AGT ((A,B),(C,D))  
 174 should never have more sites supporting it than the species tree. Even in the most extreme  
 175 scenario, when internal branch lengths  $x$  and  $y$  are zero, the species tree (SP) and AGT  
 176 ((A,B),(C,D)) are equally supported:

$$\begin{aligned}
 177 \\
 178 \quad S_{SP} = S_4 &= P(4)L(2) + P(6)L(2) + P(10)L(2) \\
 179 \quad &= \left(\frac{1}{18} \times 1\right) + \left(\frac{1}{18} \times 1\right) + \left(\frac{1}{18} \times 1\right) \quad (2) \\
 180 \quad &= 0.1667
 \end{aligned}$$

$$\begin{aligned}
 181 \\
 182 \quad S_{AGT} = S_1 &= P(1)L(6) + P(14)L(6) + P(15)L(6) \\
 183 \quad &= \left(\frac{1}{9} \times \frac{7}{6}\right) + \left(\frac{1}{18} \times \frac{1}{3}\right) + \left(\frac{1}{18} \times \frac{1}{3}\right) \\
 184 \quad &= 0.1667, \quad (3)
 \end{aligned}$$

185 where branch lengths are given in coalescent units, and for each  $u$  the single branch being  
 186 considered is labeled  $b = 1$  (Fig. 2).

187 Because the probability of observing the congruent gene tree only increases as the  $x$  and  $y$   
 188 branch lengths in the species tree become larger, the total length of internal branches over all  
 189 gene trees supporting the species tree will always be greater than that supporting the AGT. We



190 derive expected values for any  $x$  and  $y$  in Appendix A. As a result, even though the most common  
191 tree matches the AGT, the most common site pattern supports the species tree. Therefore,  
192 parsimony-based methods should accurately recover the species tree topology in the AZ.

193 In order to confirm our theoretical expectations, we performed coalescent simulations  
194 across parameter space for species tree  $((A,B),C),D$ ). More specifically, we simulated 20,000  
195 gene trees at each of multiple coordinates forming a grid across tree space (Fig. 3; see details in  
196 Appendix B). First, we recorded the most common gene tree at each coordinate and observed a  
197 very close match with the theoretical AZ (Degnan and Rosenberg 2006; Supplementary Fig. 1).  
198 We then simulated one 1-kb nucleotide sequence per gene tree using the Jukes-Cantor model  
199 (Jukes and Cantor 1969), and concatenated all 20,000 sequences into one single alignment per  
200 grid coordinate. By using maximum parsimony to estimate the species tree from each  
201 concatenated alignment we were able to recapitulate Liu and Edwards' (2009) result: the  
202 estimated species tree species was congruent with the true species tree across all of tree space  
203 (Fig. 3; the same was true using neighbor-joining on the concatenated alignments; result not  
204 shown). Finally, we compared the expected “SP:AGT” ratio of the total lengths of internal  
205 branches supporting either topology (i.e.,  $S_4:S_I$ ; see Equation 1) to the simulated ratio (obtained  
206 by summing simulated gene tree internal branch lengths). This was done for 19 different pairs of  
207  $x$  and  $y$  values, and for each pair we replicated our simulations 100 times (each replicate consisted  
208 of 20,000 simulated gene trees). The expected ratio was closely approximated by the simulated  
209 ratio (Fig. 4).

210 Our results suggest that parsimony succeeds inside the AZ for a four-taxon rooted tree  
211 because there will always be more sites supporting the species tree topology than any other  
212 topology. This is in contrast to the explanation put forward by Liu and Edwards (2009) for why  
213 parsimony correctly recovers the species tree in the AZ. In their simulations, the site pattern

214 supporting the species tree was also observed to be the most common, but this outcome was  
215 interpreted to be a result of long-branch attraction (LBA; (Felsenstein 1978) biasing parsimony  
216 against the AGT. They concluded that parsimony was therefore getting the right answer for the  
217 wrong reasons (Liu and Edwards 2009). We note that given the value of  $\theta$  (the population  
218 mutation parameter) used in our simulations, terminal branches are not close to being saturated,  
219 and so LBA is not biasing parsimony against the AGT.

220       When concatenating sequences, clarifying the distinction between the most common gene  
221 tree and the most common site pattern in the dataset is critical: even if the most common gene  
222 tree is incongruent, more site patterns can still support the congruent gene tree because they come  
223 from multiple different topologies each with longer internal branches on average. For the  
224 asymmetric species tree with four taxa, we should always expect more site patterns supporting  
225 the species tree rather than the AGT (Fig. 4). Therefore, when parsimony- and distance-based  
226 methods succeed in reconstructing the species tree, they both do so for the *right* reasons.

227       Hence for the species tree considered here, concatenation cannot be causing phylogenetic  
228 reconstruction methods to fail *per se*. Concatenation is expected to remove sampling noise, and  
229 as long as there is more phylogenetic signal supporting the species tree than supporting any other  
230 topology, concatenation should not interfere with species tree reconstruction when using counts  
231 of informative site patterns (i.e., parsimony). Because the phylogenetic signal supporting the  
232 species tree topology (((A,B),C),D) is always higher than that supporting AGT ((A,B),(C,D)), our  
233 results imply that when species tree reconstruction from concatenated datasets fail, it must be due  
234 to properties of likelihood-based methods, not concatenation.

235

236 SPECIES TREE RECONSTRUCTION FROM CONCATENATED DATA FAILS BECAUSE OF LIKELIHOOD

237

238 *The anomaly zone is not directly connected to the failure of likelihood methods*

239

240 In the previous section we showed that parsimony-based methods are expected to succeed  
241 for species tree (((A,B),C),D) in all areas of tree space examined. There are always more sites  
242 supporting the species tree than the most common gene tree in the dataset, which is the AGT  
243 [((A,B),(C,D))]. These results have two implications. First, as mentioned above, concatenation  
244 *per se* is not responsible for the failure of tree reconstruction in the AZ. It must be that  
245 likelihood-based methods fail because of properties of these methods when applied to  
246 concatenated datasets. Second, the above results suggest that the region in tree space where  
247 likelihood-based methods fail does not necessarily coincide with the AZ. If such methods are  
248 failing for reasons other than the frequency of the most common gene tree, then there is no reason  
249 that their failure should follow the frequency of the most common gene tree (i.e., the AZ). This  
250 second implication is supported by our results and by previous observations that likelihood-based  
251 methods can fail even *outside* the AZ, and succeed *inside* the AZ (Kubatko and Degnan 2007).

252 Similar to what was done in our investigation of parsimony- and distance-based methods  
253 described in the previous section, we examined the performance of maximum-likelihood  
254 estimation across the tree space of species tree (((A,B),C),D). We used the same concatenated  
255 alignments at the same coordinates of tree space, and recorded the maximum-likelihood tree at  
256 each grid point (see details in Appendix B). In agreement with many previous studies (e.g.,  
257 Kubatko and Degnan 2007; Liu and Edwards 2009), species tree reconstruction with maximum-  
258 likelihood on concatenated data failed at many points in the AZ (Fig. 5).

259 However, because we covered parameter space more extensively than previous  
260 investigations, we are able to observe clear regions inside the AZ where maximum-likelihood  
261 succeeds in recovering the species tree, instead of just a few coordinates in tree space near the AZ

262 border (Fig. 5). We also identified a region outside the AZ where the AGT was favored by  
263 maximum-likelihood (Fig. 5). Our results confirm the disconnection between the AZ and the area  
264 of parameter space in which likelihood-based methods applied to concatenated data seem to be  
265 inconsistent.

266 These results support the conclusions drawn from the previous section: the failure of  
267 analyses using concatenation is not due to the identity of the most frequent gene tree topology.  
268 But these observations beg the questions of why the maximum-likelihood tree differs from the  
269 most parsimonious tree, and what determines the shape of the region in tree space in which  
270 maximum-likelihood estimation seems to be inconsistent. We address these questions in the next  
271 section.

272  
273 *The cost of discordant sites explains why likelihood-based methods fail to reconstruct the species*  
274 *tree from concatenated data*

275  
276 While likelihood-based methods have many advantages over other classes of methods (e.g.,  
277 Huelsenbeck 1995; Swofford et al. 2001; Ogden and Rosenberg 2006), the demonstration that  
278 maximum-likelihood tree estimation can fail to reconstruct the species tree is not entirely  
279 surprising. When models are mis-specified, likelihood-based methods can be unsuccessful in  
280 recovering the true tree, and in such cases these methods have been shown to converge on the  
281 wrong answer (e.g., Gaut and Lewis 1995; Sullivan and Swofford 1997). Although maximum-  
282 likelihood estimation from concatenated data can be robust to low ILS levels (Tonini et al. 2015;  
283 Mirarab et al. 2016), the success of this approach is clearly not guaranteed when there are high  
284 levels of ILS. So what is the nature of model inadequacy when concatenated data is used in a  
285 maximum-likelihood framework? One possible answer is that, in cases involving ILS,

286 concatenation violates the assumption that all sites have evolved along a single topology (Roch  
287 and Steel 2015). Because parsimony and neighbor-joining applied to concatenated datasets do not  
288 fail, however, the failure of maximum-likelihood estimation must be due to differences as to how  
289 discordant trees are accommodated by different methods. Below we offer one hypothesis to  
290 explain why likelihood favors the AGT over the species tree, but parsimony does not.

291 To better explain our hypothesis, it will be useful to first discuss one important  
292 consequence of including discordant tree topologies in an alignment. Relative to a focal tree,  
293 discordant topologies contain branches that do not exist in this tree (Robinson and Foulds 1981).  
294 For example, the AGT (tree on the right in Fig. 6) has an internal branch leading to the ancestor  
295 of C and D that is not present in the species tree. Conversely, if the AGT is our focal tree, then  
296 the species tree has an exclusive internal branch leading to the ancestor of A, B, and C. We refer  
297 to these as “discordant branches,” and to the site patterns produced by substitutions on them as  
298 “discordant sites” (all other sites are considered concordant). Such site patterns are particularly  
299 important because they must be resolved by proposing more than one substitution on the focal  
300 tree; we previously described this phenomenon, referring to the artefactual changes as  
301 “substitutions produced by ILS” (SPILS; Mendes and Hahn 2016). Site 1 in Fig. 6 shows an  
302 example of SPILS where a substitution occurring on a branch exclusive to the species tree would  
303 be inferred to have been due to two substitutions on the AGT. Site 2 shows the opposite pattern,  
304 as the substitution on the discordant branch of the AGT must be mapped twice onto the species  
305 tree.

306 In the presence of gene tree discordance, evaluating a tree on a concatenated alignment will  
307 thus entail considering both concordant and discordant site patterns. The key distinction between  
308 them is that discordant sites will always cost more on the focal tree than concordant sites. How

309 the total score of a tree is calculated – and how parsimony and likelihood methods deal with these  
310 costs in particular – turns out to be crucial in understanding their behavior.

311 In the case of parsimony-based methods, if we define  $O$  and  $D$  as the sets of all possible  
312 concordant and discordant site patterns, respectively, the parsimony score of a tree  $t$ ,  $P_t$ , will be:

313  
314 
$$P_t = \sum_{o;o \in O} n_o C(o) + \sum_{d;d \in D} n_d C(d) \quad (4)$$
  
315

316 where  $n_o$  and  $C(o)$  are the count and cost of concordant site pattern  $o$ , and  $n_d$  and  $C(d)$  are the  
317 count and cost of discordant site pattern  $d$ .  $C(o)$  and  $C(d)$  equal the minimum number of  
318 substitutions required to generate site patterns  $o$  and  $d$ , respectively, on tree  $t$ . The tree  $t$  with the  
319 lowest parsimony score,  $P_t$ , is considered the most parsimonious and will be preferred over less  
320 parsimonious ones.

321 Under a simple weighting scheme for a rooted four-taxon tree, it is easy to see that  $C(o) = 1$   
322 and  $C(d) = 2$  for all possible (biallelic) site patterns: when a site pattern is concordant with a  
323 topology, it can always be resolved with a single substitution; when it is discordant, it can always  
324 be resolved with two substitutions (Fig. 6). The most parsimonious tree is therefore the one that  
325 maximizes  $n_o$  (which directly reflects the value of  $S_t$  in equation 1). For the rooted asymmetric  
326 four-taxon tree case, we have proven above that maximum-parsimony methods are consistent  
327 under this weighting scheme.

328 The likelihood score of a tree  $t$ ,  $L_t$ , can also be written in terms similar to those in equation  
329 4:

330 
$$L_t = \sum_{o;o \in O} n_o C(o) + \sum_{d;d \in D} n_d C(d) \quad (5)$$
  
331

332 with the difference that  $C(o)$  and  $C(d)$  now correspond to the negative log-likelihoods of  
333 concordant site pattern  $o$ , and discordant site pattern  $d$ , respectively (the lower the negative log-  
334 likelihoods, the less costly and the more likely a site is). A crucial distinction is that in maximum-  
335 likelihood tree estimation, the likelihood that a site in the alignment contributes to the final tree  
336 likelihood depends on the mapping of nucleotide substitutions at all other sites, expressed as  
337 branch lengths. Branch lengths serve as a proxy for the expected probability of change, and so  
338 nucleotide transitions – including homoplasious ones – along longer branches are more probable  
339 (less “costly”) than along shorter ones. This property grants likelihood-based methods more  
340 robustness (compared to parsimony-based methods) to problems such as long-branch attraction,  
341 making them good choices for molecular phylogenetic analyses.

342 We hypothesize that it is precisely the attribute of likelihood-based methods mentioned  
343 above – their ability to take branch lengths into account when evaluating different trees – that  
344 contributes to their convergence on the incorrect tree topology in the presence of high levels of  
345 ILS. While the parsimony costs of concordant and discordant sites for the rooted four-taxon  
346 species tree are fixed at 1 and 2, respectively, this is not true for the likelihood costs. Negative  
347 log-likelihoods of concordant and discordant sites depend on the branch lengths of the trees on  
348 which they are evaluated. If the species tree and AGT differ in their branch lengths, so will the  
349 likelihood costs of concordant and discordant site patterns under either topology, leading to  
350 possibly different final tree likelihoods.

351 An immediately obvious difference in branch lengths between the two competing  
352 topologies considered here is the length of branches exclusive to each tree. Concordant site  
353 patterns for each topology will include substitutions occurring on these branches, and the costs,  
354  $C(o)$ , may therefore differ on the two topologies. A less obvious – but ultimately more important  
355 – difference is that sites that are differentially discordant on each topology (i.e., those sites that

356 are not discordant on both) will be resolved along different branches that potentially have  
357 different lengths (e.g., site 1 in Fig. 6 is resolved along branches C and D of the AGT; site 2 is  
358 resolved on the species tree along branch D and the internal branch leading to the root). The  
359 difference in lengths between these two pairs of branches will then contribute to differences in  
360 final tree likelihoods. Therefore, unlike the case of maximum-parsimony described above, the  
361 maximum-likelihood tree is not simply the one for which  $n_o$  is the largest. The maximum-  
362 likelihood tree will instead be the one with the lowest  $L_t$ , obtained by minimizing both the left  
363 and the right sums in equation 5.

364 A closer look at one of the simulated datasets where likelihood fails may be helpful in  
365 demonstrating this behavior (Supplementary Fig. 2). Two site patterns have a very large impact  
366 on the total tree likelihoods of the species tree and the AGT: “11100” (site 1, Fig. 6) and “00110”  
367 (site 2, Fig. 6). As expected, the negative log-likelihood (the “cost”) of site pattern 11100 is lower  
368 for the species tree than for the AGT (9.91 vs. 11.62; Fig. 6), as this site pattern is concordant  
369 with the former and discordant with the latter. Conversely, the cost of site pattern 00110 is lower  
370 for the AGT than for the species tree (10.25 vs. 13.11; Fig. 6) because it is concordant with the  
371 AGT. Note, however, that the difference in costs of the concordant site patterns in either topology  
372 ( $9.91 - 10.25 = -0.34$ ) is smaller than the difference in costs of discordant sites ( $13.11 - 11.62 =$   
373  $1.49$ ). This means that concordant sites cost slightly more on the AGT than the species tree, but  
374 that discordant sites cost considerably more on the species tree. Ultimately, this implies that when  
375 there are a large number of discordant sites (and the number of concordant sites is not very  
376 different between competing topologies; Supplementary Fig. 2), these differences in cost can  
377 cause likelihood-based methods to prefer the AGT over the species tree.

378 Our hypothesis to explain the failure of likelihood methods makes testable predictions. One  
379 fundamental prediction is that the length of branches on which sites discordant with one topology



380 and concordant with the other (and vice-versa) are resolved will have a large effect on the final  
381 likelihood, and therefore on the tree that is preferred. Importantly, in the topologies considered  
382 here these branches are all either tips or an internal branch subtending the entire clade (Fig. 6),  
383 and therefore will have no effect on the number of concordant or discordant sites.

384 We tested this prediction by exploring two more dimensions of tree space: the lengths of  
385 branches  $w$  and  $z$ . We ran two new sets of simulations, changing  $w$  and  $z$  one at a time. In the first  
386 set,  $z$  was held constant at 1, and  $w$  was varied from the original value of 12 to either 8 or 20  
387 (dark and light gray shaded regions, respectively; Fig. 7a). The second set of simulations varied  
388 the  $z$  dimension:  $w$  was held constant at 12, while  $z$  varied from the original value of 1 to either  
389 0.1 or 10 (dark and light gray shaded regions, respectively; Fig. 7b). These simulations show that,  
390 as predicted, the length of branches not directly determining the number of concordant and  
391 discordant sites can have a large effect on the region of parameter space in which likelihood fails  
392 (parsimony still favors the species tree in all cases; results not shown). Note that non-informative  
393 sites and sites discordant with the two competing trees can be resolved along the same branches  
394 in both trees; this results in almost identical likelihoods of these sites under the species tree and  
395 the AGT (Supplementary Fig. 2; data not shown for non-informative sites). Therefore, although  
396 changing the lengths of  $z$  and  $w$  will affect the likelihood of all sites, the impact should be the  
397 greatest for sites that are concordant with one tree and discordant with the other, ultimately  
398 leading to the different observed maximum-likelihood outcomes between conditions.

399 The results presented in this section are natural mathematical consequences of the theory  
400 behind long-established models in phylogenetics. It is likely that they have not been considered  
401 before simply because few empirical examples existed in the area of tree space where they  
402 become important. But, as discussed more thoroughly below, clarity about the points raised here

403 is critical in avoiding misconceptions about the real cause of the failure of likelihood-based  
404 methods, and possibly suggest ways in which these failures can be ameliorated.

405

406 DISCUSSION

407

408       The increasing availability of genome-scale datasets has revolutionized and modernized the  
409 field of molecular phylogenetics. Sequences from more species and more (longer) genomic  
410 segments have provided evolutionary biologists with unprecedented insight into the history of life  
411 on Earth. The influx of data has also clarified the relevance and pervasiveness of phenomena that  
412 generate gene tree discordance, such as ILS (e.g., Pollard et al. 2006; Hobolth et al. 2011;  
413 Brawand et al. 2014; Zhang et al. 2014; Suh et al. 2015; Pease et al. 2016). This in turn has led to  
414 the proliferation of methods capable of dealing with discordance (e.g., Liu and Pearl 2007; Than  
415 et al. 2008; Liu et al. 2009, 2010; Heled and Drummond 2010; Larget et al. 2010; Mirarab and  
416 Warnow 2015; Solís-Lemus and Ané 2016).

417       When ILS is present at high levels, most gene trees will be discordant with the species tree.  
418 Therefore, there has been much interest in the behavior of standard phylogenetic approaches in  
419 these instances. Kubatko and Degnan (2007) showed through simulation of a four-taxon  
420 phylogeny that the commonly used approach of concatenation and analysis by maximum-  
421 likelihood when there are high levels of ILS can lead to strong support for the incorrect tree (the  
422 anomalous gene tree; AGT). These authors evaluated the performance of concatenation coupled  
423 with likelihood across multiple points of tree space, including in the anomaly zone (Degnan and  
424 Rosenberg 2006), in which the topology of the most common gene tree does not match the  
425 species tree. Two key conclusions are often drawn from this paper, though neither was one the  
426 authors made themselves. The first is that concatenation fails *per se* (i.e., concatenation is the

427 procedure that *directly* causes tree estimation to fail), regardless of the tree-building method used  
428 downstream, such as maximum-parsimony or maximum-likelihood (for rare exceptions, see Liu  
429 and Edwards 2009; Wu et al. 2014; Degnan and Rhodes 2015; Roch and Warnow 2015;  
430 RoyChoudhury et al. 2015; Mirarab et al. 2016). The second conclusion drawn from their study is  
431 that the failure of concatenation is caused by the species tree inhabiting the AZ (e.g., Leaché et al.  
432 2015; Olave et al. 2015; Tang et al. 2015; DaCosta and Sorenson 2016; Edwards et al. 2016;  
433 Linkem et al. 2016). In fact, both points are addressed directly by Kubatko and Degnan (2007):  
434 “Although these results indicate that the existence of an AGT is neither necessary nor sufficient  
435 for statistical inconsistency, they demonstrate that [maximum-likelihood] estimation from  
436 concatenated sequences can perform poorly for points in or even near the anomaly zone.”

437         The two apparently common conclusions drawn from early studies noted above are  
438 intriguing, but not entirely surprising. While the studies by Kubatko and Degnan (2007) and Liu  
439 and Edwards (2009) clearly suggest otherwise, the specific results that speak to these  
440 misconceptions might have been obscured by the main findings of these papers, or perhaps by the  
441 lack of a clear explanation for the observed inconsistency. Kubatko and Degnan (2007) consider  
442 the failure of likelihood-based estimation in certain regions of tree space “surprising,” but do not  
443 provide an explanation for it. Liu and Edwards (2009) tentatively suggest that long-branch  
444 attraction (Felsenstein 1978) can explain why maximum-parsimony succeeds in recovering the  
445 species tree inside the AZ, but do not strongly commit to this hypothesis.

446         Here, we recapitulate and extend the results of Kubatko and Degnan (2007) and Liu and  
447 Edwards (2009) for the same rooted four-taxon species tree, revealing a clear disjunction between  
448 the AZ and the region in tree space where likelihood-based estimation fails. Furthermore, we  
449 provide a proof for why maximum-parsimony should be successful across this area of tree space

450 under the infinite-site model, and propose a hypothesis to explain why maximum-likelihood trees  
451 can be incorrect.

452 Our results are limited to asymmetric trees in which ILS is observed among four species;  
453 that is, when a pair consecutive speciation events (i.e., a pair of nodes) occurs along the same tree  
454 path and in a short time span, producing a pectinate topology. Many studies of the AZ have also  
455 been limited to four-taxon phylogenies, though some have gone beyond this (e.g., Rosenberg and  
456 Tao 2008). While this may seem to limit the generality of the results presented here, we stress  
457 that the total number of species in a tree is not the most relevant factor in determining the failure  
458 of likelihood-based methods from concatenated data. Instead, what matters is the maximum  
459 number of lineages among which ILS occurs, even if only in a small part of a larger tree. Our  
460 results imply that as long as the “problematic nodes” of a species tree are limited to four taxa,  
461 concatenation coupled with maximum-parsimony or neighbor-joining should succeed in  
462 obtaining the correct topology. Extending our analyses to radiations involving five species is  
463 tedious, but should be possible. The shape of the anomaly zone for just five species has been  
464 shown to be highly complex and to behave in unpredictable ways (Rosenberg and Tao 2008). The  
465 exponentially larger numbers of distinct topologies and histories (Degnan and Salter 2005) that  
466 result from considering additional species are sure to make the task of predicting the success of  
467 parsimony, or of any other method, more difficult. For six taxa (and potentially for more)  
468 involved in ILS, it has been shown that maximum-likelihood applied to concatenated data will  
469 always result in the wrong species tree (Roch and Steel 2015).

470 We also note that our demonstration that maximum-parsimony correctly infers the species  
471 tree only holds if other phenomena capable of generating phylogenetic incongruence, such as  
472 introgression, are not present in the dataset at levels that considerably shift the distribution of  
473 gene tree topologies and site patterns. In such cases, the most parsimonious tree is not guaranteed

474 to be correct. Importantly, introgression will also affect most, if not all, other methods that infer  
475 species trees (e.g., Leaché et al. 2014; Solís-Lemus et al. 2016). We have also ignored areas of  
476 parameter space where parsimony- and distance-based methods will fail for a host of other  
477 reasons, including similarity due to homoplasy (e.g., Felsenstein 1978). These problems with  
478 parsimony are well known, and nothing presented here should obviate such concerns. However,  
479 for datasets using nearly homoplasy-free characters (such as retrotransposon insertions; Suh et al.  
480 2015), our results imply that parsimony can and should be used to avoid problems due to high  
481 levels of ILS.

482 Our results also suggest that the length of the branches leading to and descending from a  
483 pair of closely spaced speciation events (denoted  $w$  and  $z$  in Fig. 1a) can affect the outcome of  
484 maximum-likelihood analyses on concatenated data. These branches are the ones that absorb the  
485 cost of discordant site patterns, and as a consequence their length can determine whether the true  
486 species tree or an AGT is favored. While many studies vary the lengths of internal branches of a  
487 phylogeny to examine the performance of methods for inferring species trees, our results suggest  
488 that varying these surrounding branches is necessary to reveal the complete behavior of  
489 phylogenetic methods. Our simulations also indicate that if both these branch lengths are short  
490 enough, the boundaries of the region in which likelihood-based methods fail will retract, leading  
491 to an increased success of these methods in estimating the species tree. This dependence suggests  
492 to us that in the future we may find additional ways to ensure the accuracy of maximum-  
493 likelihood analyses on concatenated data, possibly by taking into account the substitution rate  
494 variation induced by discordance.

495

496 ACKNOWLEDGMENTS

497

498           We thank Rafael Guerrero for help with the mathematical proof. We also thank Elizabeth  
499   Housworth, Laura Kubatko, and David Swofford for comments that helped to improve this work.  
500   The research was supported by National Science Foundation grant DEB-1136707.

501

502

503 REFERENCES

- 504
- 505 Brawand D., Wagner C.E., Li Y.I., Malinsky M., Keller I., Fan S., Simakov O., Ng A.Y., Lim  
506 Z.W., Bezault E., Turner-Maier J., Johnson J., Alcazar R., Noh H., Russell P., Aken B.,  
507 Alföldi J., Amemiya C., Azzouzi N., Baroiller J.-F., Barloy-Hubler F., Berlin A., Bloomquist  
508 R., Carleton K., Conte M., D’Cotta H., Eshel O., Gaffney L., Galibert F., Gante H., Gnerre  
509 S., Greuter L., Guyon R., Haddad N., Haerty W., Harris R., Hofmann H., Hourlier T., Hulata  
510 G., Jaffe D., Lara M., Lee A., MacCallum I., Mwaiko S., Nikaido M., Nishihara H., Ozouf-  
511 Costaz C., Penman D., Przybylski D., Rakotomanga M., Renn S., Ribeiro F., Ron M.,  
512 Salzburger W., Sanchez-Pulido L., Santos M., Searle S., Sharpe T., Swofford R., Tan F.,  
513 Williams L., Young S., Yin S., Okada N., Kocher T., Miska E., Lander E., Venkatesh B.,  
514 Fernald R., Meyer A., Ponting C., Streelman J., Lindblad-Toh K., Seehausen O., Palma F.  
515 2014. The genomic substrate for adaptive radiation in African cichlid fish. *Nature* 513:375–  
516 81.
- 517 DaCosta J.M., Sorenson M.D. 2016. ddRAD-seq phylogenetics based on nucleotide, indel, and  
518 presence-absence polymorphisms: Analyses of two avian genera with contrasting histories.  
519 *Mol. Phylogenet. Evol.* 94:122–154.
- 520 Degnan J., Rhodes J. 2015. There are no caterpillars in a wicked forest. *Theor. Popul. Biol.*  
521 105:17–23.
- 522 Degnan J., Rosenberg N. 2006. Discordance of species trees with their most likely gene trees.  
523 *PLoS Genet.* 2:0762–68.
- 524 Degnan J.H., Rosenberg N.A. 2009. Gene tree discordance, phylogenetic inference and the  
525 multispecies coalescent. *Trends Ecol. Evol.* 24:332–340.
- 526 Degnan J.H., Salter L.A. 2005. Gene tree distributions under the coalescent process. *Evolution*

- 527 59:24–37.
- 528 Edwards S., Xi Z., Janke A., Faircloth B., McCormack J., Glenn T., Zhong B., Wu S., Lemmon  
529 E., Lemmon A., Leaché A., Liu L., Davis C. 2016. Implementing and testing the  
530 multispecies coalescent model: A valuable paradigm for phylogenomics. *Mol. Phylogenet.*  
531 *Evol.* 94:447–462.
- 532 Edwards S.V. 2009. Is a new and general theory of molecular systematics emerging? *Evolution*  
533 63:1–19.
- 534 Felsenstein J. 1978. Cases in which parsimony or compatibility methods will be positively  
535 misleading. *Syst. Zool.* 27:401–410.
- 536 Gaut B.S., Lewis P.O. 1995. Success of maximum likelihood phylogeny inference in the four-  
537 taxon case. *Mol. Biol. Evol.* 12:152–162.
- 538 Gee H. 2003. Evolution: Ending incongruence. *Nature* 425:782–782.
- 539 Hahn M.W., Nakhleh L. 2016. Irrational exuberance for resolved species trees. *Evolution* 70:7–  
540 17.
- 541 Heled J., Drummond A. 2010. Bayesian inference of species trees from multilocus data. *Mol.*  
542 *Biol. Evol.* 27:570–580.
- 543 Hinchliff C., Smith S., Allman J., Burleigh J., Chaudhary R., Coghill L., Crandall K., Deng J.,  
544 Drew B., Gazis R., Gude K., Hibbett D., Katz L., Laughinghouse H., McTavish E., Midford  
545 P., Owen C., Ree R., Rees J., Soltis D., Williams T., Cranston K. 2015. Synthesis of  
546 phylogeny and taxonomy into a comprehensive tree of life. *Proc. Natl. Acad. Sci. USA*  
547 112:12764–12769.
- 548 Hobolth A., Dutheil J.Y., Hawks J., Schierup M.H., Mailund T. 2011. Incomplete lineage sorting  
549 patterns among human, chimpanzee, and orangutan suggest recent orangutan speciation and  
550 widespread selection. *Genome Res.* 21:349–356.



- 551 Huang H., Knowles L. 2009. What is the danger of the anomaly zone for empirical  
552 phylogenetics? *Syst. Biol.* 58:527–536.
- 553 Hudson R.R. 1983. Testing the constant-rate neutral allele model with protein sequence data.  
554 *Evolution* 37:203–217.
- 555 Huelsenbeck J., Bull J.J., Cunningham C. 1996. Combining data in phylogenetic analysis. *Trends*  
556 *Ecol. Evol.* 11:152–158.
- 557 Huelsenbeck J.P. 1995. Performance of phylogenetic methods in simulation. *Syst. Biol.* 44:17–  
558 48.
- 559 Jukes T.H., Cantor C.R. 1969. Evolution of protein molecules. New York: Academic Press p. 21–  
560 132.
- 561 Kubatko L., Degnan J. 2007. Inconsistency of phylogenetic estimates from concatenated data  
562 under coalescence. *Syst. Biol.* 56:17–24.
- 563 Larget B., Kotha S., Dewey C., Ané C. 2010. BUCKy: Gene tree/species tree reconciliation with  
564 Bayesian concordance analysis. *Bioinformatics* 26:2910–2911.
- 565 Leaché A., Harris R., Rannala B., Yang Z. 2014. The influence of gene flow on species tree  
566 estimation: A simulation study. *Syst. Biol.* 63:17–30.
- 567 Leaché A.D., Chavez A.S., Jones L.N., Grummer J.A., Gottscho A.D., Linkem C.W. 2015.  
568 Phylogenomics of Phrynosomatid lizards: Conflicting signals from sequence capture versus  
569 restriction site associated DNA sequencing. *Genome Biol. Evol.* 7:706–719.
- 570 Linkem C.W., Minin V.N., Leaché A.D. 2016. Detecting the anomaly zone in species trees and  
571 evidence for a misleading signal in higher-level skink phylogeny (Squamata: Scincidae).  
572 *Syst. Biol.* 65:465–477.
- 573 Liu L., Edwards S.V. 2009. Phylogenetic analysis in the anomaly zone. *Syst. Biol.* 58:452–460.
- 574 Liu L., Pearl D.K. 2007. Species trees from gene trees: reconstructing Bayesian posterior

- 575 distributions of a species phylogeny using estimated gene trees distributions. *Syst. Biol.*  
576 56:504–514.
- 577 Liu L., Yu L., Edwards S.V. 2010. A maximum pseudo-likelihood approach for estimating  
578 species trees under the coalescent model. *BMC Evol. Biol.* 10:302.
- 579 Liu L., Yu L., Pearl D., Edwards S. 2009. Estimating species phylogenies using coalescence  
580 times among sequences. *Syst. Biol.* 58:468–477.
- 581 Mendes F.K., Hahn M.W. 2016. Gene tree discordance causes apparent substitution rate  
582 variation. *Syst. Biol.* 65:711–721.
- 583 Mirarab S., Bayzid M., Warnow T. 2016. Evaluating summary methods for multilocus species  
584 tree estimation in the presence of incomplete lineage sorting. *Syst. Biol.* 65:366–380.
- 585 Mirarab S., Warnow T. 2015. ASTRAL-II: coalescent-based species tree estimation with many  
586 hundreds of taxa and thousands of genes. *Bioinformatics* 31:i44–i52.
- 587 Murphy W.J., Eizirik E., O’Brien S.J., Madsen O., Scally M., Douady C.J., Teeling E., Ryder  
588 O.A., Stanhope M.J., de Jong W.W., Springer M.S. 2001. Resolution of early placental  
589 mammal radiation using Bayesian phylogenetics. *Science* 294:2348–2351.
- 590 O’Meara B.C. 2012. Evolutionary inferences from phylogenies: A review of methods. *Annu.*  
591 *Rev. Ecol. Evol.* 43:267–285.
- 592 Ogden T., Rosenberg M. 2006. Multiple sequence alignment accuracy and phylogenetic  
593 inference. *Syst. Biol.* 55:314–328.
- 594 Olave M., Avila L.J., Sites Jr J.W., Morando M. 2015. Model-based approach to test hard  
595 polytomies in the *Eulaemus* clade of the most diverse South American lizard genus  
596 *Liolaemus* (Liolaemini, Squamata). *Zool. J. Linn. Soc.* 174:169–184.
- 597 Page R.D.M. 1996. On consensus, confidence, and “total evidence”. *Cladistics* 12:83–92.
- 598 Pamilo P., Nei M. 1988. Relationships between gene trees and species trees. *Mol. Biol. Evol.*

- 599 5:568–583.
- 600 Pease J.B., Haak D.C., Hahn M.W., Moyle L.C. 2016. Phylogenomics reveals three sources of  
601 adaptive variation during a rapid radiation. *PLoS Biol.* 14:e1002379.
- 602 Philippe H., Delsuc F., Brinkmann H., Lartillot N. 2005. Phylogenomics. *Annu. Rev. Ecol. Evol.*  
603 36:541–562.
- 604 Pollard D.A., Iyer V.N., Moses A.M., Eisen M.B. 2006. Widespread discordance of gene trees  
605 with species tree in *Drosophila*: evidence for incomplete lineage sorting. *PLoS Genet.*  
606 2:1634–1647.
- 607 Robinson D.F., Foulds L.R. 1981. Comparison of phylogenetic trees. *Math. Biosci.* 53:131–147.
- 608 Roch S., Steel M. 2015. Likelihood-based tree reconstruction on a concatenation of aligned  
609 sequence data sets can be statistically inconsistent. *Theor. Popul. Biol.* 100:56–62.
- 610 Roch S., Warnow T. 2015. On the robustness to gene tree estimation error (or lack thereof) of  
611 coalescent-based species tree methods. *Syst. Biol.* 64:663–676.
- 612 Rokas A., Williams B.L., Carroll S.B. 2003. Genome-scale approaches to resolving incongruence  
613 in molecular phylogenies. *Nature* 425:798–804.
- 614 Rosenberg N.A. 2002. The probability of topological concordance of gene trees and species trees.  
615 *Theor. Popul. Biol.* 61:225–247.
- 616 Rosenberg N.A., Tao R. 2008. Discordance of species trees with their most likely gene trees: The  
617 case of five taxa. *Syst. Biol.* 57:131–140.
- 618 RoyChoudhury A., Willis A., Bunge J. 2015. Consistency of a phylogenetic tree maximum  
619 likelihood estimator. *J. Stat. Plan. Inference* 161:73–80.
- 620 Slowinski J.B., Page R.D.M. 1999. How should species phylogenies be inferred from sequence  
621 data? *Syst. Biol.* 48:814–825.
- 622 Solís-Lemus C., Ané C. 2016. Inferring phylogenetic networks with maximum pseudolikelihood

- 623 under incomplete lineage sorting. *PLoS Genet.* 12:e1005896.
- 624 Solís-Lemus C., Yang M., Ané C. 2016. Inconsistency of species tree methods under gene flow.
- 625 *Syst. Biol.* 65:843–851.
- 626 Soltis P., Soltis D., Chase M. 1999. Angiosperm phylogeny inferred from multiple genes as a tool
- 627 for comparative biology. *Nature* 402:402–404.
- 628 Steel M., Penny D. 2000. Parsimony, likelihood, and the role of models in molecular
- 629 phylogenetics. *Mol. Biol. Evol.* 17:839–850.
- 630 Suh A., Smeds L., Ellegren H. 2015. The dynamics of incomplete lineage sorting across the
- 631 ancient adaptive radiation of neoavian birds. *PLoS Biol.* 13:e1002224.
- 632 Sullivan J., Swofford D.L. 1997. Are guinea pigs rodents? The importance of adequate models in
- 633 molecular phylogenetics. *J. Mamm. Evol.* 4:77–86.
- 634 Swofford D.L., Waddell P.J., Huelsenbeck J.P., Foster P.G., Lewis P.O., Rogers J.S. 2001. Bias
- 635 in phylogenetic estimation and its relevance to the choice between parsimony and likelihood
- 636 methods. *Syst. Biol.* 50:525–539.
- 637 Tajima F. 1983. Evolutionary relationship of DNA sequences in finite populations. *Genetics*
- 638 105:437–460.
- 639 Tang L., Zou X., Zhang L., Ge S. 2015. Multilocus species tree analyses resolve the ancient
- 640 radiation of the subtribe Zizaniinae (Poaceae). *Mol. Phylogenet. Evol.* 84:232–239.
- 641 Than C., Ruths D., Nakhleh L. 2008. PhyloNet: a software package for analyzing and
- 642 reconstructing reticulate evolutionary relationships. *BMC Bioinformatics* 9:322.
- 643 Tonini J., Moore A., Stern D., Shcheglovitova M., Ortí G. 2015. Concatenation and species tree
- 644 methods exhibit statistically indistinguishable accuracy under a range of simulated
- 645 conditions. *PLoS Curr.* 7.
- 646 White M.A., Ané C., Dewey C.N., Larget B.R., Payseur B.A. 2009. Fine-scale phylogenetic

647 discordance across the house mouse genome. *PLoS Genet.* 5:e1000729

648 Wu Y.-C., Rasmussen M.D., Bansal M.S., Kellis M. 2014. Most parsimonious reconciliation in  
649 the presence of gene duplication, loss, and deep coalescence using labeled coalescent trees.  
650 *Genome Res.* 24:475-486.

651 Zhang G., Li C., Li Q., Li B., Larkin D.M., Lee C., Storz J.F., Antunes A., Greenwold M.J.,  
652 Meredith R.W., Ödeen A., Cui J., Zhou Q., Xu L., Pan H., Wang Z., Jin L., Zhang P., Hu H.,  
653 Yang W., Hu J., Xiao J., Yang Z., Liu Y., Xie Q., Yu H., Lian J., Wen P., Zhang F., Li H.,  
654 Zeng Y., Xiong Z., Liu S., Zhou L., Huang Z., An N., Wang J., Zheng Q., Xiong Y., Wang  
655 G., Wang B., Wang J., Fan Y., Fonseca R., Alfaro-Núñez A., Schubert M., Orlando L.,  
656 Mourier T., Howard J., Ganapathy G., Pfenning A., Whitney O., Rivas M., Hara E., Smith J.,  
657 Farré M., Narayan J., Slavov G., Romanov M., Borges R., Machado J., Khan I., Springer M.,  
658 Gatesy J., Hoffmann F., Opazo J., Håstad O., Sawyer R., Kim H., Kim K.-W., Kim H., Cho  
659 S., Li N., Huang Y., Bruford M., Zhan X., Dixon A., Bertelsen M., Derryberry E., Warren  
660 W., Wilson R., Li S., Ray D., Green R., O'Brien S., Griffin D., Johnson W., Haussler D.,  
661 Ryder O., Willerslev E., Graves G., Alström P., Fjeldså J., Mindell D., Edwards S., Braun E.,  
662 Rahbek C., Burt D., Houde P., Zhang Y., Yang H., Wang J., Jarvis E., Gilbert M., Wang J.,  
663 Ye C., Liang S., Yan Z., Zepeda M., Campos P., Velazquez A., Samaniego J., Avila-Arcos  
664 M., Martin M., Barnett R., Ribeiro A., Mello C., Lovell P., Almeida D., Maldonado E.,  
665 Pereira J., Sunagar K., Philip S., Dominguez-Bello M., Bunce M., Lambert D., Brumfield R.,  
666 Sheldon F., Holmes E., Gardner P., Steeves T., Stadler P., Burge S., Lyons E., Smith J.,  
667 McCarthy F., Pitel F., Rhoads D., Froman D. 2014. Comparative genomics reveals insights  
668 into avian genome evolution and adaptation. *Science* 346:1311–1320.

669 Zuckerkandl E., Pauling L. 1965. Molecules as documents of evolutionary history. *J. Theor. Biol.*  
670 8:357–366.

671 FIGURES

672

673 Figure 1:

674

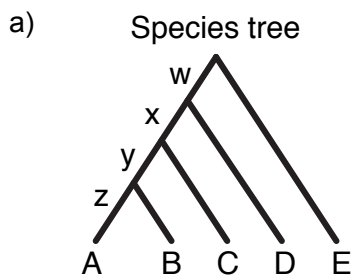

675

676

677

678

679

680

681

682

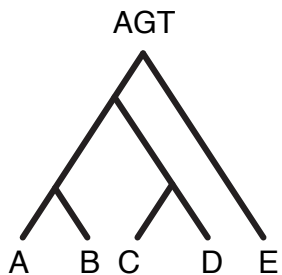

683

684

685

686

687

688

689

690

691

692

693

694

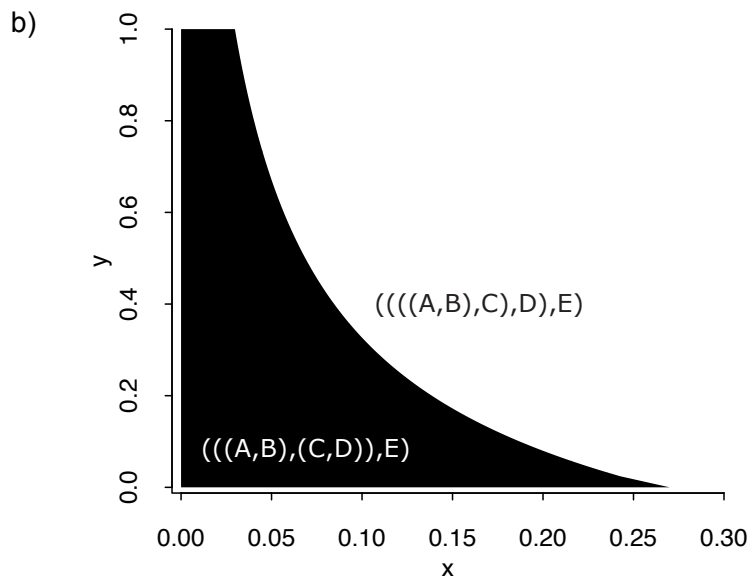

695 Figure 2:

696

697

698

699

700

701

702

703

704

705

706

707

708

709

710

711

712

713

714

715

716

717

718

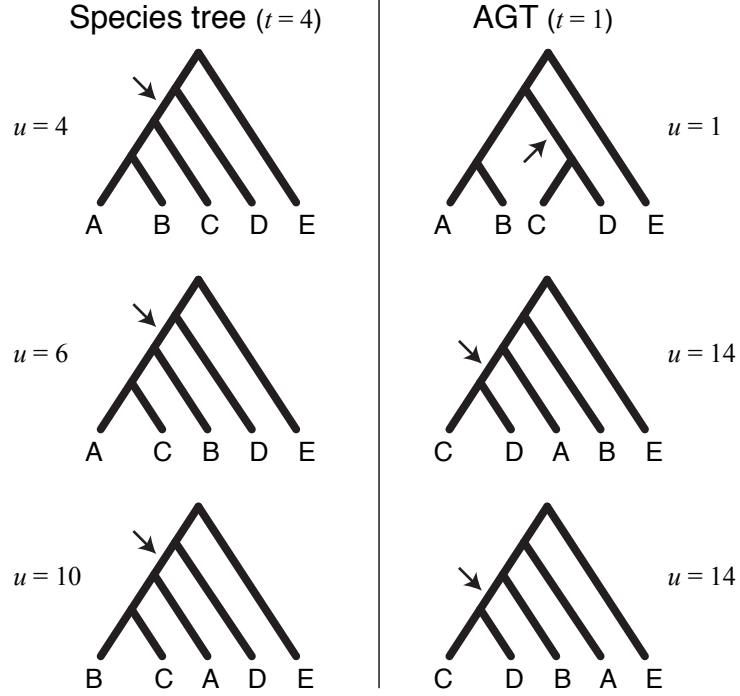

719 Figure 3:

720  
721  
722  
723  
724  
725  
726  
727  
728  
729  
730  
731  
732  
733  
734  
735  
736  
737  
738  
739  
740  
741  
742

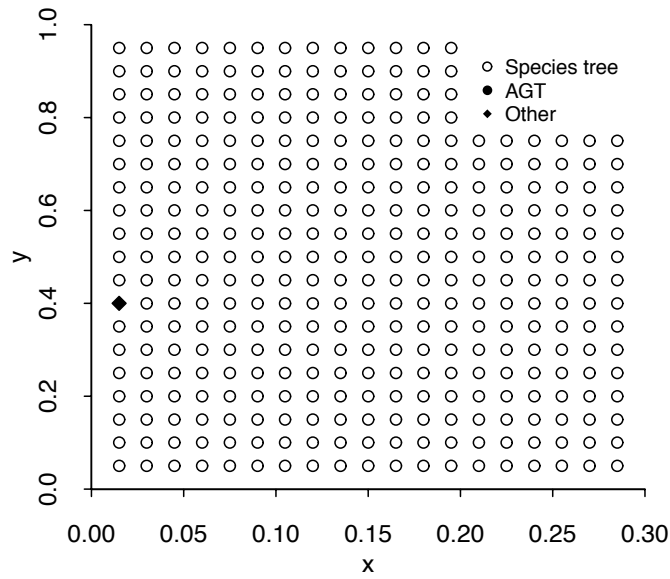



743 Figure 4:

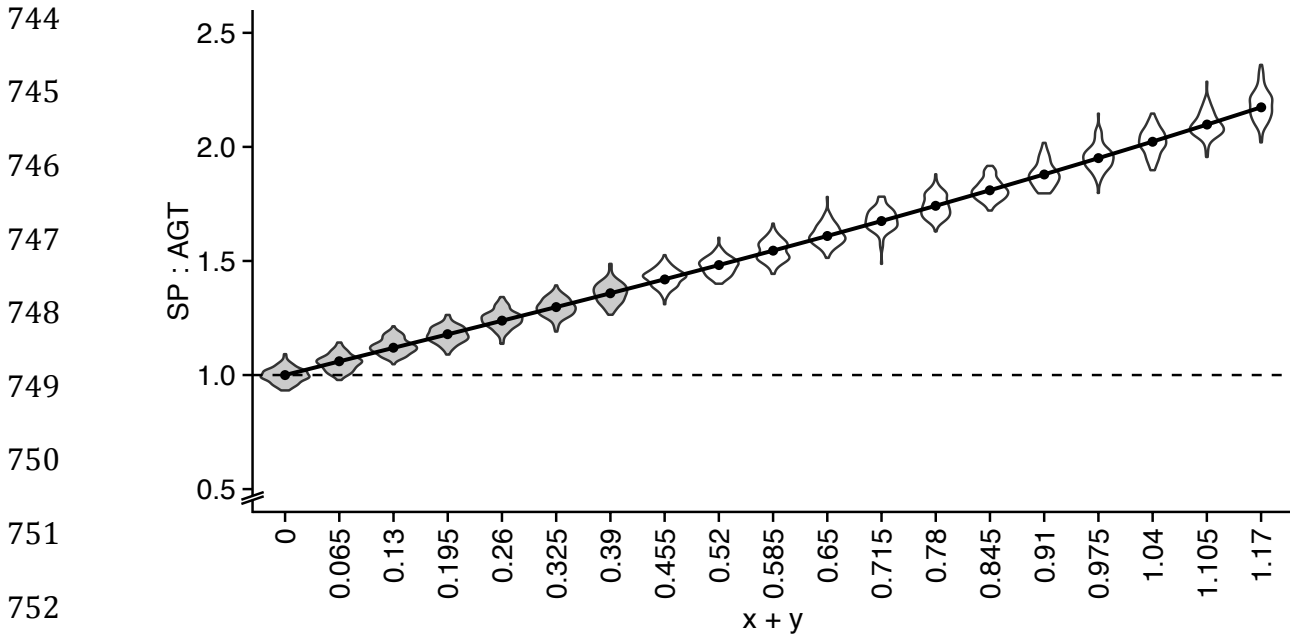

744  
745  
746  
747  
748  
749  
750  
751  
752  
753  
754  
755  
756  
757  
758  
759  
760  
761  
762  
763  
764  
765  
766

767 Figure 5:

768

769

770

771

772

773

774

775

776

777

778

779

780

781

782

783

784

785

786

787

788

789

790

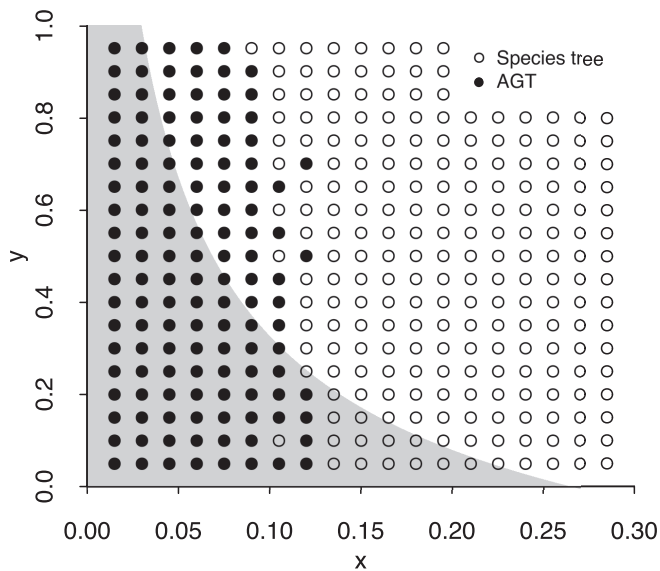

791 Figure 6:

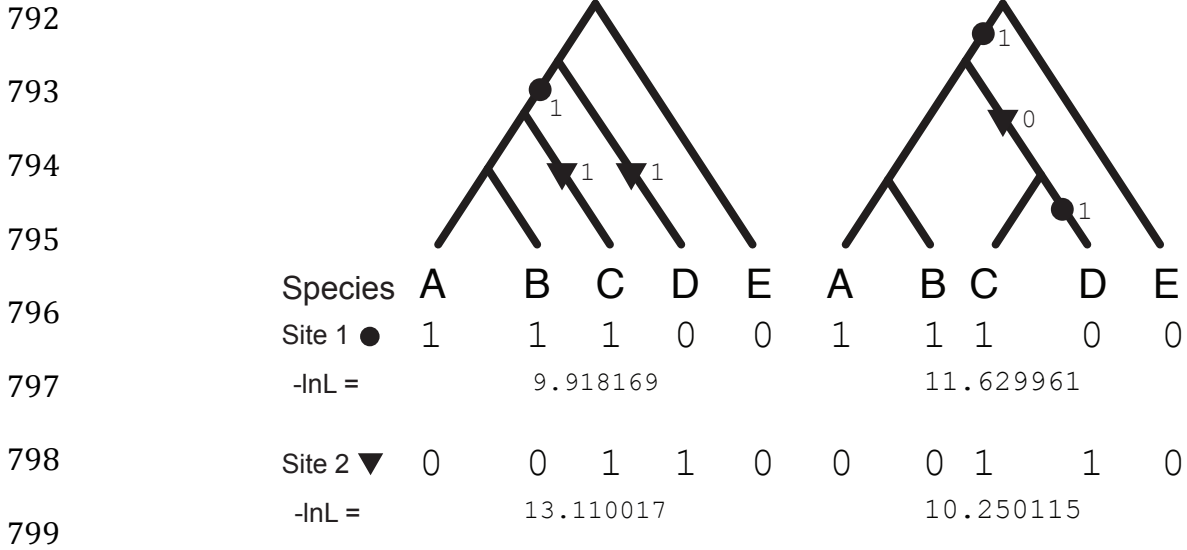

800

801

802

803

804

805

806

807

808

809

810

811

812

813

814

815 Figure 7:

816

a)  $w$  varies,  $z$  fixed

817

818

819

820

821

822

823

824

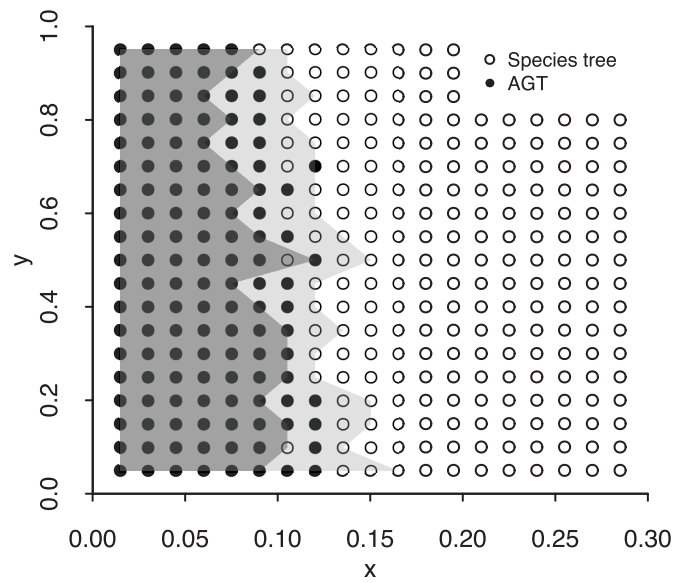

825

b)  $z$  varies,  $w$  fixed

826

827

828

829

830

831

832

833

834

835

836

837

838

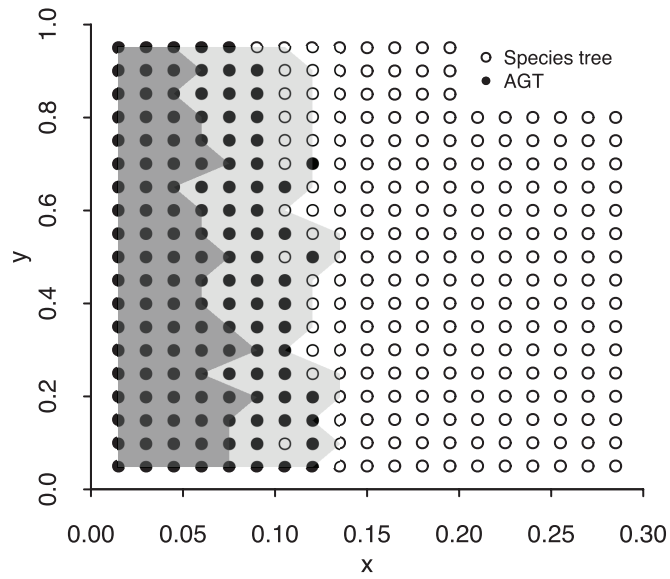

839 TABLES

840

841 Table 1: Probability of each gene tree topology under species tree (((A,B),C),D),E) (where E is  
 842 the outgroup), when ILS is the sole cause of incongruence (from Table V and Equation 2 in  
 843 Rosenberg, 2002). Branches  $y$  and  $x$  are the most recent and oldest ingroup internal branches,  
 844 respectively, with lengths expressed in coalescent units.

| Topology      | $t$ or $u$ | $P(u)$                                                                                        |
|---------------|------------|-----------------------------------------------------------------------------------------------|
| ((A,B),(C,D)) | 1          | $\frac{1}{3}e^{-x} - \frac{1}{6}e^{-(x+y)} - \frac{1}{18}e^{-(3x+y)}$                         |
| ((A,C),(B,D)) | 2          | $\frac{1}{6}e^{-(x+y)} - \frac{1}{18}e^{-(3x+y)}$                                             |
| ((B,C),(A,D)) | 3          | $\frac{1}{6}e^{-(x+y)} - \frac{1}{18}e^{-(3x+y)}$                                             |
| (((A,B),C),D) | 4          | $1 - \frac{2}{3}e^{-x} - \frac{2}{3}e^{-y} + \frac{1}{3}e^{-(x+y)} + \frac{1}{18}e^{-(3x+y)}$ |
| (((A,B),D),C) | 5          | $\frac{1}{3}e^{-x} - \frac{1}{6}e^{-(x+y)} - \frac{1}{9}e^{-(3x+y)}$                          |
| (((A,C),B),D) | 6          | $\frac{1}{3}e^{-x} - \frac{1}{6}e^{-(x+y)} + \frac{1}{18}e^{-(3x+y)}$                         |
| (((A,C),D),B) | 7          | $\frac{1}{6}e^{-(x+y)} - \frac{1}{9}e^{-(3x+y)}$                                              |
| (((A,D),B),C) | 8          | $\frac{1}{18}e^{-(3x+y)}$                                                                     |
| (((A,D),C),B) | 9          | $\frac{1}{18}e^{-(3x+y)}$                                                                     |
| (((B,C),A),D) | 10         | $\frac{1}{3}e^{-x} - \frac{1}{6}e^{-(x+y)} + \frac{1}{18}e^{-(3x+y)}$                         |
| (((B,C),D),A) | 11         | $\frac{1}{6}e^{-(x+y)} - \frac{1}{9}e^{-(3x+y)}$                                              |
| (((B,D),A),C) | 12         | $\frac{1}{18}e^{-(3x+y)}$                                                                     |
| (((B,D),C),A) | 13         | $\frac{1}{18}e^{-(3x+y)}$                                                                     |
| (((C,D),A),B) | 14         | $\frac{1}{18}e^{-(3x+y)}$                                                                     |
| (((C,D),B),A) | 15         | $\frac{1}{18}e^{-(3x+y)}$                                                                     |

845

846 SUPPLEMENTARY FIGURES

847

848 Supplementary Figure 1:

849

850

851

852

853

854

855

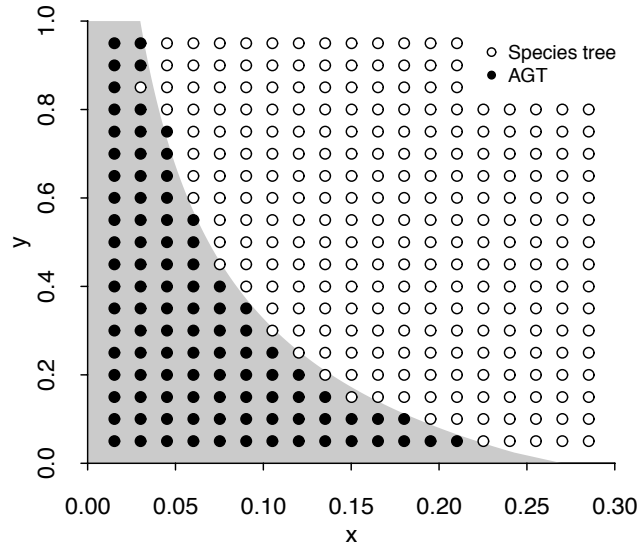

856

857

858

859

860

861

862

863

864

865

866

867

868

869

870 Supplementary Figure 2:

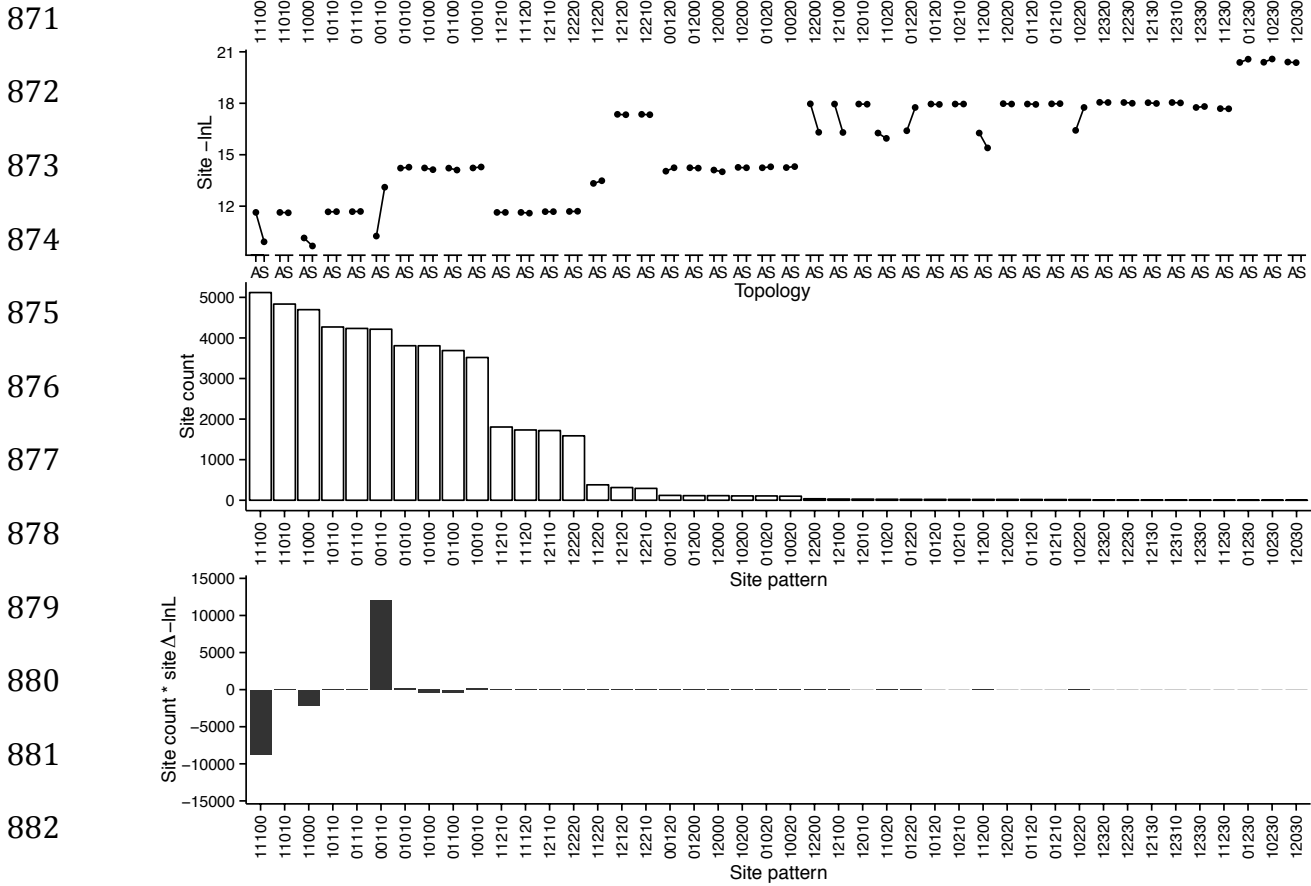

894 FIGURE CAPTIONS

895

896 Figure 1: (a) Top tree: smallest species tree for which an anomaly zone can be defined, where  $z$  is  
897 the length of terminal branches A and B, and  $w$ ,  $x$  and  $y$  are the lengths of the three internal  
898 branches (oldest to youngest), respectively. Bottom tree: the most common gene tree (an  
899 anomalous gene tree, AGT) when species tree  $((((A,B),C),D),E)$  (top tree) is inside the anomaly  
900 zone. Branch lengths are arbitrary and were not drawn in proportion to theoretical or simulated  
901 averages. (b) Phylogenetic tree space for species tree  $((((A,B),C),D),E)$ , where  $x$  and  $y$  correspond  
902 to the lengths of the oldest and youngest ingroup internal branches, respectively (as shown in [a];  
903  $x$  and  $y$  are measured in coalescent units, i.e.,  $N_e$  generations). The region shaded in black  
904 corresponds to the anomaly zone (Degnan and Rosenberg 2006), in which the most common  
905 gene tree is AGT  $((((A,B),C),D),E)$ .

906

907 Figure 2: Gene tree topologies that give support to the species tree (left column;  $t = 4$ , Table 1) or  
908 to the AGT (right column;  $t = 1$ , Table 1). Arrows indicate the internal branch that each gene tree  
909 topology  $u$  contributes to topology  $t$ . Branch lengths are arbitrary and were not drawn in  
910 proportion to theoretical or simulated averages.

911

912 Figure 3: Topology reconstructed by parsimony across the tree space of species tree  
913  $((((A,B),C),D),E)$ . The phylogeny at each grid point was estimated from a concatenated  
914 alignment of 20,000 1-kb loci generated under the multispecies coalescent simulated at that  
915 coordinate of tree space. Branches  $x$  and  $y$  are measured in coalescent units.

916



917 Figure 4: Expected (connected dots) and simulated (100 replicates per coordinate; violin plots)  
918 support for species tree (((A,B),C),D),E) and AGT (((A,B),(C,D)),E) expressed as a ratio of total  
919 internal branch lengths supporting either topology, at 19 coordinates across tree space (see  
920 Appendix B). Coordinates for which violin plots are shaded in gray are located inside the  
921 anomaly zone. The sum of  $x$  and  $y$  is in coalescent units.

922  
923 Figure 5: Topology reconstructed using maximum-likelihood across the tree space of species tree  
924 (((A,B),C),D),E). The phylogeny at each grid point was estimated from a concatenated  
925 alignment of 20,000 1-kb loci generated under the multispecies coalescent simulated at that  
926 coordinate of tree space (these are the same alignments used in Figure 3). Branches  $x$  and  $y$  are  
927 measured in coalescent units. The region shaded in gray corresponds to the anomaly zone  
928 (Degnan and Rosenberg 2006), in which the most common gene tree is the AGT.

929  
930 Figure 6: The species tree topology (left) and the anomalous gene tree topology (right). Filled  
931 circles and triangles represent character state transitions. Site 1 is concordant with the species tree  
932 and discordant with anomalous gene tree. Conversely, site 2 is concordant with the anomalous  
933 gene tree and discordant with the species tree. Negative log-likelihoods ( $-\ln L$ ) for each site  
934 pattern were computed on the maximum-likelihood tree obtained from concatenated data when  $x$   
935  $= 0.015$  and  $y = 0.05$ .

936  
937 Figure 7: Regions in tree space where likelihood-based methods fail to recover the species tree  
938 (black dots and regions shaded in gray). Dots are the same in both (a) and (b), and match those in  
939 Fig. 5 ( $z = 1$  and  $w = 12$  in these simulations). (a) Simulations with  $z = 1$ , varying  $w$  to be either  $w$

940 = 8 (dark gray) or  $w = 20$  (light gray). (b) Simulations with  $w = 12$ , varying  $z$  to be either  $z = 0.01$

941 (dark gray) or  $z = 10$  (light gray).

942

943

944

945

946

947

948

949

950

951

952

953

954

955

956

957

958

959

960

961

962

963

964 SUPPLEMENTARY FIGURE CAPTIONS

965

966 Supplementary Figure 1: Phylogenetic tree space for species tree (((A,B),C),D),E), where  $x$  and  
967  $y$  correspond to the lengths of the oldest and youngest ingroup internal branches, respectively (as  
968 shown in Fig. 1a). The region shaded in gray corresponds to the anomaly zone (derived in  
969 Degnan and Rosenberg 2006; and shaded in black in Fig. 1b), in which the most common gene  
970 tree is AGT (((A,B),(C,D)),E). Dots show the most common simulated gene tree at each tree  
971 space coordinate (out of 20,000 trees).

972

973 Supplementary Figure 2: Site likelihoods for the species simulated with  $x = 0.015$  and  $y = 0.05$ .  
974 Site patterns are coded based on the different alleles observed at a site (0 corresponds to the  
975 nucleotide observed in the outgroup; every other number represents a different, derived  
976 nucleotide, regardless of identity). Top panel: the negative log-likelihood (smaller means more  
977 likely) of all possible site patterns under the maximum-likelihood branch lengths inferred from a  
978 concatenated alignment under the species tree topology (S) or anomalous gene tree topology (A).  
979 Middle panel: counts of all site patterns in the concatenated alignment (20,000 1-kb simulated  
980 loci; see Appendix B). Bottom panel: the product of the top and middle panels, expressed as the  
981 negative log-likelihood difference between the maximum-likelihood trees with the species tree  
982 and anomalous gene tree topologies ( $\Delta\text{-lnL} = -\text{lnL}_S - (-\text{lnL}_A)$ ). The species tree is more likely if  
983 the likelihood mass above zero summed across all site patterns is greater than that below zero.

## Appendix A

### *Calculating $S_t$ , the overall support for a topology $t$*

For rooted species tree  $((A,B),(C,D))$  (outgroup omitted), maximum-parsimony methods should recover the topology  $t$  that has the largest support ( $S_t$ ; Eq. A.1 below, but see main text for a more thorough explanation), with support here meaning the total length of gene tree branches that are present as internal branches in topology  $t$ . Two topologies compete when data is concatenated: the species tree topology  $((A,B),C),D)$ , and the anomalous gene tree (AGT) topology  $((A,B),(C,D))$ . Because these two topologies share the internal branch subtending node  $\{A, B\}$ , one can compare  $S_4$  and  $S_1$  (Table 1, main text) by focusing on the branches these two topologies do *not* share: the branch subtending node  $\{A, B, C\}$  (present in the species tree topology) and the branch subtending  $\{C, D\}$  (present in the AGT). The species tree topology ( $t = 4$ ; Table 1, main text) will be returned as the most parsimonious (instead of the AGT,  $t = 1$ ) if  $S_4 > S_1$ .

$S_t$  is defined in the main text as:

$$S_t = \sum_{u; u \in U} \sum_{b; b \in B_{u,t}} P(u) L(b | u) \quad (\text{A.1})$$

where  $U$  is the set of gene tree topologies that share internal branches with topology  $t$ , and  $B_{u,t}$  is the set of internal branches that each individual gene tree,  $u$ , in  $U$  shares with  $t$ .  $P(u)$  is the probability of gene tree topology  $u$  under the species tree (Table 1, main text).  $L(b|u)$  is the expected length in coalescent units ( $N_e$  generations) of branch  $b$  (in the set  $B_{u,t}$ ) given topology  $u$ . For the case where the internal branches of the species tree ( $x$  and  $y$ ; Fig. 1a, main text) have a length of zero (i.e., the species tree is a four-taxon polytomy), finding  $L(b|u)$  is straightforward using coalescent theory (Equations 2 and 3, main text).

When the species tree internal branches are not zero, however, a given gene tree topology  $u$  can be classified into different coalescent history classes (Degnan and Salter, 2005), the set of which is denoted  $H$ . A history class  $h$  is defined by the times at which coalescent events take place (Fig. A.1 and Table A.1 and A.2; see below). We can replace the probability of observing each gene tree topology,  $P(u)$ , with the probability of each history class  $h$  in  $H$  given  $u$ ,  $G(h | u)$ . Importantly, we must update the definition of  $S_t$ , as the expected branch lengths now depend on  $h$  and  $u$ :

$$S_t = \sum_{u:u \in U} \sum_{h:h \in H} \sum_{b:b \in B_{u,t}} G(h | u)L(b | u, h) \quad (\text{A.2})$$

### *Calculating the probability of a coalescent history class*

The probabilities of coalescent history classes given a gene tree topology (defined here as  $G(h | u)$ ) have been derived in Pamilo and Nei (1988) and Rosenberg (2002) for the species tree being considered here (for more general cases, see Degnan and Salter 2005). Those calculations make use of the function  $g_{ij}(\tau)$  (Tavaré, 1984), defined as:

$$g_{ij}(\tau) = \sum_{k=j}^i e^{-k(k-1)\frac{\tau}{2}} \frac{(2k-1)(-1)^{k-j} j_{(k-1)} i_{[k]}}{j!(k-j)!i_{(k)}}. \quad (\text{A.3})$$

where  $a_{(k)} = a(a+1)\dots(a+k-1)$  for  $k \geq 1$  with  $a_{(0)} = 1$ ; and  $a_{[k]} = a(a-1)\dots(a-k+1)$  for  $k \geq 1$  with  $a_{[0]} = 1$ .  $g_{ij}(\tau)$  returns the probability that  $i$  lineages descend from  $j$  lineages  $\tau$  coalescent units in the past, with  $g_{ij}(\tau) = 0$  except when  $i \geq j \geq 1$ .

From Equation (A.2), comparing  $S_1$  and  $S_4$  requires computing  $G(h | u)$ . Note, however, that because some of the history classes contribute the same support to  $S_t$ , we do

not have to calculate  $G(h | u)$  for all values of  $h$ . For example, history classes 2, 4 and 5 given  $u = 4$  all contribute 1 to  $S_4$ , and so their probabilities ( $\delta_1 + \delta_2 + \delta_3$ ) can be evaluated to  $(1 - (g_{21}(y)g_{21}(x) + g_{22}(y)g_{31}(x)\frac{1}{3}))$  (Table A.1).

### *Calculating expected branch lengths*

After calculating the probabilities of the different coalescent history classes,  $G(h | u)$ , we now must calculate the expected gene tree branch lengths for each  $t$  contributed by each  $h$ . For our purposes in comparing the species tree and the AGT, the only branches that matter are those supporting node  $\{A, B, C\}$  and node  $\{C, D\}$ . Evaluating  $S_4$ , for example, would entail summing the expected branch lengths in all coalescent histories from all three gene tree topologies that have node  $\{A, B, C\}$  (Fig. A.1; this is equivalent to summing all branches highlighted in red).

Again, expected branch lengths can be obtained with coalescent theory (Tables A.1 and A.2). Some of the expected branch lengths (such as those from history classes 2, 4 and 5, given  $u = 4$ ; Table A.1) are simply the expected time until coalescence of two lineages ( $N_e$  generations = 1 coalescent unit). For the remaining history classes, however, we must find the expected times of coalescence of either two lineages, or three lineages into their MRCA *conditioning* on finding the MRCA within a branch of length  $\tau$ . The former is used when finding the support for the species tree ( $t = 4$ ) coming from history class 1 of the congruent topology ( $h = 1$  and  $u = 4$ ; Fig. A.1): here, two lineages must coalesce in  $x$ , so we must subtract the expected time of coalescence (conditioning on it happening in  $x$ ) from  $1 + x$ .

In order to derive the expected time of coalescence of two lineages conditioning on a coalescent event happening within a branch of length  $\tau$ , we use the fact that the expected

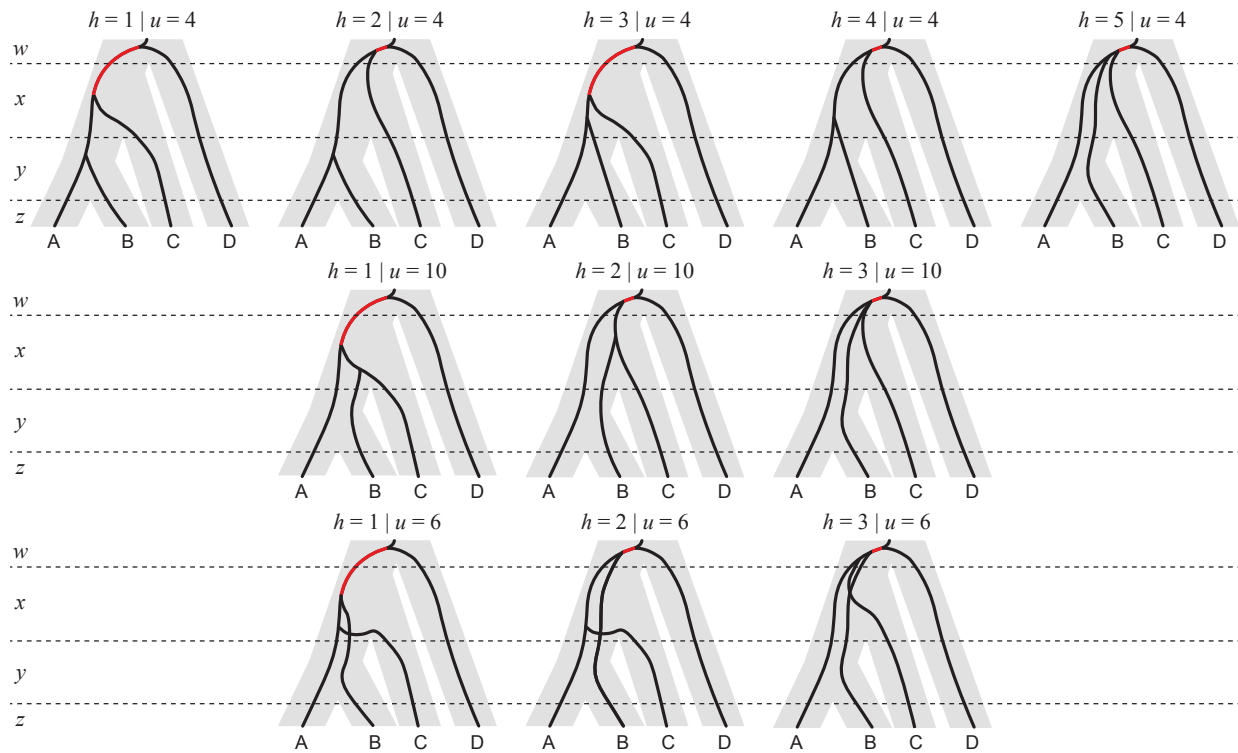

Figure A.1: All history classes from all gene tree topologies that share node  $\{A,B,C\}$  with the species tree topology. Branches in red represent the contributed support of each history class to the species tree topology.

time of coalescence of two lineages,  $v$ , is exponentially distributed (with  $\lambda = 1$ ), with *pdf*:

$$f(v_2; 1) = \begin{cases} e^{-v_2} & x \geq 0, \\ 0 & \text{otherwise,} \end{cases} \quad (\text{A.4})$$

and *cdf*:

$$F(v_2 = \tau; 1) = \begin{cases} 1 - e^{-\tau} & x \geq 0, \\ 0 & \text{otherwise.} \end{cases} \quad (\text{A.5})$$

Note that in the *cdf* above, we equate  $v_2 = \tau$  because we are interested in the probability

of coalescence before time  $\tau$ .

We can then define the *pdf* of  $v_2$  given that a coalescent event happens within a branch of length  $\tau$ , by dividing Equation (A.4) by Equation (A.5):

$$f_{v_2}(\tau \mid \text{Coalescence}) = \begin{cases} \frac{e^{-v_2}}{1-e^{-\tau}} & 0 \leq v_2 < \tau, \\ 0 & \text{otherwise,} \end{cases} \quad (\text{A.6})$$

and then finally calculate the *pdf* for the expected time for two lineages to coalesce in a branch of length  $\tau$ , conditioning on a coalescence event happening,  $q(\tau)$ :

$$q(\tau) = E[f(v_2 \mid \text{Coalescence})] = \int_0^\tau v_2 \frac{e^{-v_2}}{1-e^{-\tau}} dv_2 = 1 - \frac{\tau}{e^\tau - 1}. \quad (\text{A.7})$$

Importantly,  $q(\tau)$  converges on 1 coalescent unit, as expected (Fig. A.2).

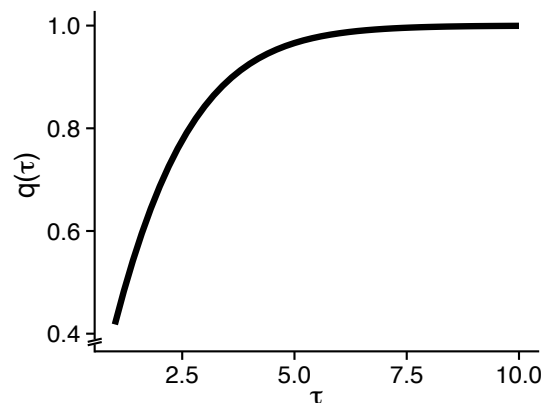

Figure A.2: Expected time of coalescence of two lineages within a branch of length  $\tau$ , conditioning on a coalescence event happening.

The same logic outlined above can be used to derive the expected time of coalescence of three lineages into their MRCA within a branch of length  $\tau$ , conditioning on their coalescence taking place in that branch. In this case, the expected time of coalescence of three lineages into their MRCA,  $v_3$ , can be seen as a variable resulting from the



convolution of two exponentially distributed random variables (with  $\lambda = 1$  and  $\lambda = 3$ , respectively). If we name the *pdfs* of these two exponential variables  $k(v_3)$  and  $l(v_3)$ , we can define the *pdf* of the convolved variable:

$$f_{k+l}(\alpha) = \int_{-\infty}^{\infty} k(v_3)l(\alpha - v_3)dv_3 = -\frac{(e^{\alpha\lambda_1} - e^{-\alpha\lambda_2})\lambda_1\lambda_2}{\lambda_1 - \lambda_2}, \quad (\text{A.8})$$

for  $\alpha > 0$ . Replacing  $\lambda_1 = 1$  and  $\lambda_2 = 3$ , we obtain *pdf*:

$$f_{k+l}(\alpha) = \begin{cases} \frac{3}{2}(-e^{-3v_3} + e^{-v_3}) & v_3 > 0, \\ 0 & \text{otherwise,} \end{cases} \quad (\text{A.9})$$

and *cdf* (similarly to what was done above, we equate  $v_3 = \tau$ ):

$$F_{k+l}(\alpha) = \begin{cases} \frac{1}{2}(2 + e^{-3\tau} - 3e^{-\tau}) & x > 0, \\ 0 & \text{otherwise.} \end{cases} \quad (\text{A.10})$$

We can then define the *pdf* of  $v_3$  given a coalescent event happens within a branch of length  $\tau$ , by dividing Equation (A.9) by Equation (A.10):

$$f_{v_3}(\tau | \text{Coalescence}) = \begin{cases} \frac{3(-e^{-3v_3} + e^{-v_3})}{2 + e^{-3\tau} - 3e^{-\tau}} & 0 \leq v_3 < \tau, \\ 0 & \text{otherwise.} \end{cases} \quad (\text{A.11})$$

The last step is to calculate the *pdf* for the expected time for two lineages to coalesce in a

branch of length  $\tau$ , conditioning on a coalescence event happening,  $r(\tau)$ :

$$\begin{aligned}
 r(\tau) &= E[f_{v_3}(\tau \mid \text{Coalescence})] = \int_0^\tau v_3 \frac{3(-e^{-3v_3} + e^{-v_3})}{2 + e^{-3\tau} - 3e^{-\tau}} dv_3 = \\
 &= \frac{1 + 8e^{3\tau} + 3b - 9e^{2\tau}(1 + \tau)}{3(-1 + e^\tau)^2(1 + 2e^\tau)}.
 \end{aligned}
 \tag{A.12}$$

Finally, we must again verify the convergence of  $r(\tau)$ , except in this case the expectation is  $1 + \frac{1}{3}$  coalescent units (Fig. A.3).

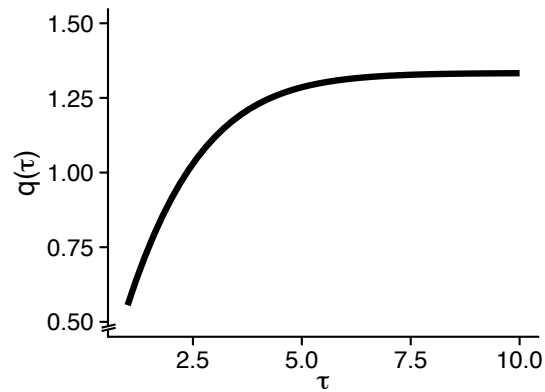

Figure A.3: Expected time of coalescence of three lineages within a branch of length  $\tau$ , conditioning on a coalescence event happening.

Table A.1: Gene trees supporting the species tree topology through the branch subtending node  $\{A,B,C\}$  (branch lengths in  $N_e$  generations).

| Topology  | $u$ | History class, $h$ | Branches containing $1^{st}$ and $2^{nd}$ coalescences | Probability of history class, $G(h   u)$ | Expected branch length, $L(b u, h)$ |
|-----------|-----|--------------------|--------------------------------------------------------|------------------------------------------|-------------------------------------|
| ((AB)C)D) | 4   | 1                  | $y, x$                                                 | $g_{21}(y)g_{21}(x)$                     | $1 + x - q(x)$                      |
|           |     | 2                  | $y, w$                                                 | $\delta_1$                               | 1                                   |
|           |     | 3                  | $x, x$                                                 | $g_{22}(y)g_{31}(x)\frac{1}{3}$          | $1 + x - r(x)$                      |
|           |     | 4                  | $x, w$                                                 | $\delta_2$                               | 1                                   |
|           |     | 5                  | $w, w$                                                 | $\delta_3$                               | 1                                   |
| ((BC)A)D) | 10  | 1                  | $x, x$                                                 | $g_{22}(y)g_{31}(x)\frac{1}{3}$          | $1 + x - r(x)$                      |
|           |     | 2                  | $x, w$                                                 | $\kappa_1$                               | 1                                   |
|           |     | 3                  | $w, w$                                                 | $\kappa_2$                               | 1                                   |
| ((AC)B)D) | 6   | 1                  | $x, x$                                                 | $g_{22}(y)g_{31}(x)\frac{1}{3}$          | $1 + x - r(x)$                      |
|           |     | 2                  | $x, w$                                                 | $\zeta_1$                                | 1                                   |
|           |     | 3                  | $w, w$                                                 | $\zeta_2$                                | 1                                   |

Table A.2: Gene trees supporting the species tree topology through the branch subtending node  $\{C,D\}$  (branch lengths in  $N_e$  generations).

| Topology   | $u$ | History class, $h$ | Branches containing $1^{st}$ and $2^{nd}$ coalescences | Probability of history class, $G(h   u)$   | Expected branch length, $L(b u, h)$ |
|------------|-----|--------------------|--------------------------------------------------------|--------------------------------------------|-------------------------------------|
| ((AB)(CD)) | 1   | 1                  | $y, w$                                                 | $g_{22}(y)g_{33}(x)\frac{1}{3}\frac{1}{3}$ | $1 + \frac{1}{6}$                   |
|            |     | 2                  | $x, w$                                                 | $\beta_1$                                  | 1                                   |
|            |     | 3                  | $w, w$                                                 | $\beta_2$                                  | 1                                   |
| ((CD)A)B)  | 14  | 1                  | $w, w$                                                 | 1                                          | $\frac{1}{3}$                       |
| ((CD)B)A)  | 15  | 1                  | $w, w$                                                 | 1                                          | $\frac{1}{3}$                       |

## Appendix B

### *Simulations across the phylogenetic space of a four-taxon species tree*

In order to understand the behavior of different tree estimation methods across phylogenetic space, we used the coalescent model to simulate gene trees from an asymmetric species tree with four species in its ingroup,  $((((A:z,B:z):y,C):x,D):w,E$ , where  $z$ ,  $y$ ,  $x$  and  $w$  are the lengths of terminal branches A and B, and the internal branches subtending (A,B), ((A,B),C) and (((A,B),C),D), respectively. Branch E leads to the outgroup, so the internal branch length  $w$  was always large enough so no ILS happened between E and any of the remaining taxa.

We explored the phylogenetic space of this species tree by simulating 20,000 gene trees at different  $x$ - and  $y$ - value combinations (measured in coalescent units, where 1 unit =  $N_e$  generations), with  $x$  varying from 0.015 to 0.285 in 0.015 increments, and  $y$  varying from 0.05 to 0.95 in 0.05 increments – for a total of 361 combinations comprising a square  $xy$ -grid ( $w$  and  $z$  were fixed for this initial set of simulations to 12 and 1 coalescent units, respectively). In addition, we further explored phylogenetic space by simulating along the  $xy$ -grid four more times: (i) with  $z = 0.1$  and  $z = 10$  (one each;  $w$  was fixed at 12 coalescent units), and (ii) with  $w = 8$  and  $w = 20$  (one each;  $z$  was fixed at 1 coalescent unit). Simulated gene trees were used in conjunction with the Jukes-Cantor nucleotide evolution model (Jukes and Cantor, 1969) and  $\theta = 0.04$  to simulate one 1-kb locus alignment per tree. All 20,000 simulated alignments from each  $xy$ -grid point were concatenated and used in downstream analyses. Coalescent simulations were done with ms (Hudson, 2002) and sequences were simulated with Seq-Gen (Rambaut and Grassly, 1997).

### *Comparing empirical and expected support for the species tree and the anomalous tree*

We summarized the difference in phylogenetic signal favoring the species tree (SP) versus the anomalous gene tree (AGT) by computing the SP:AGT ratio of the sums of branch lengths supporting each tree. Branch length support for both trees was calculated at 19 grid points along the diagonal of the  $xy$ -grid (from  $x = 0.015$  and  $y = 0.05$ , to  $x = 0.285$  and  $y = 0.95$ , and for  $x = y = 0$ ), with 100 replicates for every point, each replicate consisting of 20,000 gene trees.

For each replicate in each grid point, we computed the support for the species tree by adding the lengths of all internal branches subtending ((A,B),C); these branches were present in 3 of the 15 possible topologies: (((A,B),C),D), (((A,C),B),D), and (((B,C),A),D) (outgroup omitted). Similarly, we added the lengths of all internal branches subtending (C,D) in order to obtain the branch length support for the anomalous tree; these branches are found in topologies ((A,B),(C,D)), (((C,D),A),B), and (((C,D),B),A). Finally, we compared the SP:AGT ratios of branch length support at each grid point to the expected theoretical ratios (see Appendix A).

### *Evaluating tree inference methods on concatenated alignments across phylogenetic space*

Phylogenies were estimated from the concatenated alignments across the  $xy$ -grid using neighbor-joining, parsimony, and maximum-likelihood as implemented in PAUP\* v4.0a150 (Swofford, 2002). Maximum-likelihood estimation was done exhaustively, as in Kubatko and Degnan (2007): all 15 possible rooted topologies had their likelihoods evaluated and the top one was reported. We also estimated the maximum-likelihood tree with heuristic search; in this case PAUP\* reported one single best tree in all but one point on the grid.

### *Inferring site pattern likelihoods under the maximum-likelihood tree*

The 20 million sites in each concatenated alignment were first classified into one of

44 unique site pattern bins, after coding the ancestral state (the base present in the outgroup E) as “0”, and the derived states as “1”, “2” or “3” depending on how many different states were present at a given site. This procedure is possible because the Jukes-Cantor model does not incorporate transition-transversion bias, and so site pattern (((AA)G)G)A, for example, is equivalent to (((AA)C)C)A; both would be coded as “00110”.

The likelihood of all site patterns was computed for the maximum-likelihood tree at the grid point closest to the origin ( $x = 0.015$  and  $y = 0.05$ ). Likelihood computations were done with PAUP\*.

## REFERENCES

- Degnan, J. H. and L. A. Salter. 2005. Gene tree distributions under the coalescent process. *Evolution* 59:24–37.
- Hudson, R. R. 2002. Generating samples under a wright-fisher neutral model. *Bioinformatics* 18:337–338.
- Jukes, T. H. and C. R. Cantor. 1969. *Evolution of protein molecules*. Academic press, New York.
- Kubatko, L. S. and J. H. Degnan. 2007. Inconsistency of phylogenetic estimates from concatenated data under the coalescence. *Systematic Biology* 56:17–24.
- Pamilo, P. and M. Nei. 1988. Relationships between gene trees and species trees. *Molecular Biology and Evolution* 5:568–583.
- Rambaut, A. and N. C. Grassly. 1997. Seq-Gen: an application for the Monte Carlo simulation of DNA sequence evolution along phylogenetic trees. *Computer Applications in the Biosciences* 13:235–238.
- Rosenberg, N. A. 2002. The probability of topological concordance of gene trees and species trees. *Theoretical Population Biology* 61:225–247.
- Swofford, D. L. 2002. PAUP\*. Phylogenetic analysis using parsimony (\*and other methods). Version 4. Sinauer Associates, Sunderland, MA.
- Tavaré, S. 1984. Line-of-descent and genealogical processes, and their application in population genetics models. *Theoretical Population Biology* 26:119–164.
